# Supplementary material for: Identification of Novel and Differentially Expressed MicroRNAs of Dairy Goat Mammary Gland Tissues Using Solexa Sequencing and Bioinformatics
Source: PLoS One. 2012 Nov 14;7(11):e49463. doi: 10.1371/journal.pone.0049463 (PMC3498112; doi:10.1371/journal.pone.0049463)
Supplement: Table S1 — miRNA expression profiles in peak and late lactation. (XLS) [file pone.0049463.s005.xls]

## Sheet: Sheet1
pairwise	miR-name	S-A-total-reads	HA-total-reads	S-A-expressed	HA-expressed	S-A-std	HA-std	fold-change(log2 HA/S-A)	p-value	sig-lable
S-A-HA	miR-143	19044002	7385833	3663628	2501394	192377	338675	0.815963	0
S-A-HA	miR-143-3p	19044002	7385833	3474077	2361222	182424	319696	0.809408	0
S-A-HA	miR-378	19044002	7385833	621611	516401	32640.8	69917.8	1.09898	0	**
S-A-HA	miR-378e	19044002	7385833	654953	511109	34391.6	69201.3	1.00874	0	**
S-A-HA	miR-378d	19044002	7385833	654554	510815	34370.6	69161.5	1.00879	0	**
S-A-HA	miR-378a-3p	19044002	7385833	653954	510288	34339.1	69090.1	1.00863	0	**
S-A-HA	let-7-5p	19044002	7385833	1569878	386744	82434.2	52362.9	-0.654698	0
S-A-HA	let-7b	19044002	7385833	1414825	368460	74292.4	49887.4	-0.57454	0
S-A-HA	let-7b-5p	19044002	7385833	1374801	361024	72190.8	48880.6	-0.562552	0
S-A-HA	let-7f-5p	19044002	7385833	607104	280817	31879	38021	0.254191	0
S-A-HA	miR-148a-3p	19044002	7385833	1948637	193553	102323	26206	-1.96516	0	**
S-A-HA	miR-21-5p	19044002	7385833	562995	152649	29562.9	20667.8	-0.5164	0
S-A-HA	miR-21	19044002	7385833	562836	146553	29554.5	19842.4	-0.574788	0
S-A-HA	miR-30a	19044002	7385833	818766	135764	42993.4	18381.7	-1.22585	0	**
S-A-HA	miR-30a-5p	19044002	7385833	818248	134361	42966.2	18191.7	-1.23992	0	**
S-A-HA	miR-146b	19044002	7385833	472348	133755	24803	18109.7	-0.453753	0
S-A-HA	miR-146b-5p	19044002	7385833	473845	133427	24881.6	18065.3	-0.46186	0
S-A-HA	miR-107	19044002	7385833	320001	119406	16803.2	16166.9	-0.055697	3.45099e-30
S-A-HA	miR-103	19044002	7385833	319072	118375	16754.5	16027.3	-0.0640134	4.236e-39
S-A-HA	miR-103a-3p	19044002	7385833	309480	113446	16250.8	15359.9	-0.0813363	7.97822e-60
S-A-HA	miR-200c-3p	19044002	7385833	463571	86360	24342.1	11692.7	-1.05785	0	**
S-A-HA	miR-200c	19044002	7385833	458140	85659	24056.9	11597.7	-1.05261	0	**
S-A-HA	miR-26	19044002	7385833	77710	84124	4080.55	11389.9	1.48092	0	**
S-A-HA	miR-26a	19044002	7385833	74709	83305	3922.97	11279	1.52363	0	**
S-A-HA	miR-26a-5p	19044002	7385833	72212	79589	3791.85	10775.9	1.50683	0	**
S-A-HA	miR-4006f-5p	19044002	7385833	50560	74921	2654.9	10143.9	1.93388	0	**
S-A-HA	miR-84a	19044002	7385833	110954	64064	5826.19	8673.9	0.574128	0
S-A-HA	let-7c	19044002	7385833	264696	60941	13899.2	8251.07	-0.752347	0
S-A-HA	miR-17a*	19044002	7385833	0	54914	0.01	7435.04	19.504	0	**
S-A-HA	miR-30d	19044002	7385833	247993	50658	13022.1	6858.81	-0.924933	0
S-A-HA	miR-30d-5p	19044002	7385833	246628	50380	12950.4	6821.17	-0.924909	0
S-A-HA	miR-101	19044002	7385833	108889	48036	5717.76	6503.8	0.185834	2.94122e-120
S-A-HA	miR-101a-3p	19044002	7385833	108794	47578	5712.77	6441.79	0.173272	3.33464e-104
S-A-HA	miR-126-3p	19044002	7385833	244130	44696	12819.3	6051.59	-1.08293	0	**
S-A-HA	miR-126a	19044002	7385833	239272	44076	12564.2	5967.64	-1.07408	0	**
S-A-HA	miR-101-3p	19044002	7385833	97152	43914	5101.45	5945.71	0.220941	3.0529e-153
S-A-HA	miR-126	19044002	7385833	234511	41262	12314.2	5586.64	-1.14027	0	**
S-A-HA	miR-375	19044002	7385833	12664	40360	664.986	5464.52	3.0387	0	**
S-A-HA	miR-101a	19044002	7385833	79653	36707	4182.58	4969.92	0.248831	4.87708e-161
S-A-HA	miR-101c	19044002	7385833	80748	36289	4240.08	4913.33	0.21261	5.07689e-118
S-A-HA	miR-24b-3p	19044002	7385833	116961	35186	6141.62	4763.99	-0.36645	0
S-A-HA	miR-604	19044002	7385833	21068	35179	1106.28	4763.04	2.10617	0	**
S-A-HA	miR-141	19044002	7385833	45898	35123	2410.1	4755.46	0.980489	0
S-A-HA	let-7g-5p	19044002	7385833	91732	35012	4816.84	4740.43	-0.0230715	0.0108695
S-A-HA	let-7g	19044002	7385833	91386	34776	4798.68	4708.47	-0.027377	0.00257653
S-A-HA	miR-141-3p	19044002	7385833	46003	34323	2415.62	4647.14	0.943952	0
S-A-HA	miR-24-3p	19044002	7385833	113768	33652	5973.95	4556.29	-0.390827	0
S-A-HA	miR-16b	19044002	7385833	80001	33651	4200.85	4556.15	0.117135	1.84396e-35
S-A-HA	miR-24	19044002	7385833	107714	31670	5656.06	4287.94	-0.399513	0
S-A-HA	miR-27d-3p	19044002	7385833	82741	31154	4344.73	4218.08	-0.0426808	8.25065e-06
S-A-HA	miR-16	19044002	7385833	76405	30758	4012.02	4164.46	0.0537988	3.59867e-08
S-A-HA	miR-423-5p	19044002	7385833	26869	29279	1410.89	3964.21	1.49043	0	**
S-A-HA	miR-200b-3p	19044002	7385833	66196	25262	3475.95	3420.33	-0.023271	0.0291423
S-A-HA	miR-71c	19044002	7385833	34788	24030	1826.72	3253.53	0.832751	0
S-A-HA	miR-200b	19044002	7385833	62257	23165	3269.11	3136.41	-0.0597853	6.69685e-08
S-A-HA	miR-423*	19044002	7385833	22363	22794	1174.28	3086.18	1.39404	0	**
S-A-HA	miR-29a-3p	19044002	7385833	24255	22584	1273.63	3057.75	1.26352	0	**
S-A-HA	miR-151a-3p	19044002	7385833	66548	22161	3494.43	3000.47	-0.219868	4.65493e-88
S-A-HA	miR-451	19044002	7385833	27697	22061	1454.37	2986.93	1.03827	0	**
S-A-HA	miR-451a	19044002	7385833	28271	21294	1484.51	2883.09	0.957628	0
S-A-HA	miR-10b	19044002	7385833	100110	21137	5256.77	2861.83	-0.877239	0
S-A-HA	miR-1297	19044002	7385833	8	20532	0.4201	2779.92	12.692	0	**
S-A-HA	miR-10b-5p	19044002	7385833	97166	20193	5102.18	2734.02	-0.900092	0
S-A-HA	miR-26b-5p	19044002	7385833	14639	19995	768.693	2707.21	1.81633	0	**
S-A-HA	miR-26b	19044002	7385833	14125	19368	741.703	2622.32	1.82193	0	**
S-A-HA	miR-379-5p	19044002	7385833	71924	18895	3776.73	2558.28	-0.561965	0
S-A-HA	miR-151-3p	19044002	7385833	51443	18858	2701.27	2553.27	-0.081294	3.02449e-11
S-A-HA	let-7i	19044002	7385833	46825	18601	2458.78	2518.47	0.0346054	0.00568672
S-A-HA	miR-30b-3p	19044002	7385833	44466	17797	2334.91	2409.61	0.0454356	0.000392472
S-A-HA	let-7i-5p	19044002	7385833	27343	17782	1435.78	2407.58	0.74575	0
S-A-HA	miR-30a-3p	19044002	7385833	42406	17521	2226.74	2372.24	0.0913209	2.22582e-12
S-A-HA	miR-30e	19044002	7385833	108184	17299	5680.74	2342.19	-1.27822	0	**
S-A-HA	miR-27b-3p	19044002	7385833	56427	17153	2962.98	2322.42	-0.351421	5.47234e-179
S-A-HA	miR-30e-5p	19044002	7385833	104389	17138	5481.46	2320.39	-1.24019	0	**
S-A-HA	miR-27b	19044002	7385833	15100	16464	792.901	2229.13	1.49127	0	**
S-A-HA	miR-29c	19044002	7385833	1941	14491	101.922	1962	4.26679	0	**
S-A-HA	miR-320d	19044002	7385833	20670	14380	1085.38	1946.97	0.843029	0
S-A-HA	miR-29a	19044002	7385833	23612	14349	1239.87	1942.77	0.647934	0
S-A-HA	miR-320c	19044002	7385833	20359	14348	1069.05	1942.64	0.861687	0
S-A-HA	miR-29c-3p	19044002	7385833	1787	14074	93.8353	1905.54	4.34393	0	**
S-A-HA	miR-4006b-5p	19044002	7385833	44808	12630	2352.87	1710.03	-0.460398	4.89883e-233
S-A-HA	miR-378b	19044002	7385833	82519	12182	4333.07	1649.37	-1.39347	0	**
S-A-HA	miR-5606	19044002	7385833	16434	12008	862.949	1625.82	0.913816	0
S-A-HA	miR-126-5p	19044002	7385833	12056	11617	633.06	1572.88	1.31299	0	**
S-A-HA	miR-320a	19044002	7385833	18481	11374	970.437	1539.98	0.666201	2.27571753709998e-314
S-A-HA	miR-126*	19044002	7385833	12350	11307	648.498	1530.9	1.23921	0	**
S-A-HA	miR-27a-3p	19044002	7385833	21844	11034	1147.03	1493.94	0.381223	6.13665e-110
S-A-HA	miR-2068*	19044002	7385833	6393	11028	335.696	1493.13	2.15311	0	**
S-A-HA	miR-145-5p	19044002	7385833	2970	10977	155.955	1486.22	3.25245	0	**
S-A-HA	miR-1	19044002	7385833	50629	10804	2658.53	1462.8	-0.861894	0
S-A-HA	miR-1-3p	19044002	7385833	50543	10771	2654.01	1458.33	-0.863855	0
S-A-HA	miR-145	19044002	7385833	2889	10200	151.701	1381.02	3.18643	0	**
S-A-HA	miR-27a	19044002	7385833	20890	9999	1096.93	1353.81	0.303547	2.06424e-65
S-A-HA	miR-4175-3p	19044002	7385833	23548	9933	1236.5	1344.87	0.121201	2.85572e-12
S-A-HA	miR-181a	19044002	7385833	81615	9887	4285.6	1338.64	-1.67873	0	**
S-A-HA	miR-191-5p	19044002	7385833	37002	9372	1942.97	1268.92	-0.61467	5.73116149175846e-322
S-A-HA	miR-191	19044002	7385833	35263	9179	1851.66	1242.78	-0.575242	2.93913e-273
S-A-HA	miR-320	19044002	7385833	14616	9158	767.486	1239.94	0.69206	2.14785e-271
S-A-HA	miR-181a-5p	19044002	7385833	71330	8953	3745.54	1212.19	-1.62756	0	**
S-A-HA	miR-29b-3p	19044002	7385833	1036	8832	54.4003	1195.8	4.45822	0	**
S-A-HA	miR-352	19044002	7385833	21261	8809	1116.41	1192.69	0.0953449	2.04432e-07
S-A-HA	miR-378c	19044002	7385833	56750	8773	2979.94	1187.81	-1.32697	0	**
S-A-HA	miR-29b	19044002	7385833	1025	8625	53.8227	1167.78	4.43941	0	**
S-A-HA	miR-30b-5p	19044002	7385833	2441	8601	128.177	1164.53	3.18354	0	**
S-A-HA	miR-29d	19044002	7385833	13	8518	0.6826	1153.29	10.7224	0	**
S-A-HA	miR-30b	19044002	7385833	2396	8492	125.814	1149.77	3.19198	0	**
S-A-HA	miR-1c	19044002	7385833	32899	8306	1727.53	1124.59	-0.619314	2.76543e-290
S-A-HA	miR-4206-3p	19044002	7385833	11018	8198	578.555	1109.96	0.939986	0
S-A-HA	miR-23a	19044002	7385833	3118	7929	163.726	1073.54	2.71302	0	**
S-A-HA	miR-29e	19044002	7385833	989	7923	51.9324	1072.73	4.36851	0	**
S-A-HA	miR-885-3p	19044002	7385833	2882	7874	151.334	1066.1	2.81653	0	**
S-A-HA	miR-200a	19044002	7385833	24649	7861	1294.32	1064.33	-0.28224	3.61839e-53
S-A-HA	miR-3432	19044002	7385833	20575	7707	1080.39	1043.48	-0.050147	0.00917187
S-A-HA	miR-200a-3p	19044002	7385833	24566	7632	1289.96	1033.33	-0.320026	1.21708e-66
S-A-HA	miR-23a-3p	19044002	7385833	3301	7599	173.335	1028.86	2.56941	0	**
S-A-HA	miR-125b-5p	19044002	7385833	18559	7486	974.533	1013.56	0.056652	0.00418381
S-A-HA	miR-2014*	19044002	7385833	9625	7475	505.409	1012.07	1.00179	0	**
S-A-HA	miR-92a-3p	19044002	7385833	14636	7166	768.536	970.236	0.336223	3.317e-57
S-A-HA	miR-25	19044002	7385833	9437	7119	495.537	963.872	0.95985	0
S-A-HA	miR-92b-3p	19044002	7385833	14701	7077	771.949	958.186	0.3118	3.37687e-49
S-A-HA	miR-125c	19044002	7385833	17392	7050	913.253	954.53	0.0637755	0.00177661
S-A-HA	let-7e-5p	19044002	7385833	21872	6963	1148.5	942.751	-0.2848	3.68471e-48
S-A-HA	let-7e	19044002	7385833	22049	6921	1157.79	937.064	-0.305157	4.99458e-55
S-A-HA	miR-5425	19044002	7385833	0	6766	0.01	916.078	16.4832	0	**
S-A-HA	miR-16-5p	19044002	7385833	5502	6680	288.91	904.434	1.6464	0	**
S-A-HA	let-7d-5p	19044002	7385833	10555	6469	554.243	875.866	0.660192	7.50378e-177
S-A-HA	miR-25-3p	19044002	7385833	7923	6451	416.036	873.429	1.06998	0	**
S-A-HA	miR-411	19044002	7385833	8459	6437	444.182	871.533	0.972406	0
S-A-HA	miR-4754	19044002	7385833	0	6326	0.01	856.505	16.3862	0	**
S-A-HA	let-7d	19044002	7385833	10257	6271	538.595	849.058	0.656663	7.19108e-170
S-A-HA	miR-199	19044002	7385833	18368	6266	964.503	848.381	-0.185074	8.3821e-19
S-A-HA	miR-186-5p	19044002	7385833	21427	6180	1125.13	836.737	-0.427247	2.21607e-98
S-A-HA	miR-92a	19044002	7385833	12725	6110	668.189	827.259	0.308083	8.57842e-42
S-A-HA	miR-199*	19044002	7385833	18052	5981	947.91	809.794	-0.227196	1.16518e-26
S-A-HA	miR-199a-3p	19044002	7385833	15492	5890	813.485	797.473	-0.0286797	0.194964
S-A-HA	miR-411-5p	19044002	7385833	6957	5854	365.312	792.598	1.11746	0	**
S-A-HA	miR-23b	19044002	7385833	3494	5695	183.47	771.071	2.07132	0	**
S-A-HA	miR-1591	19044002	7385833	4759	5477	249.895	741.555	1.56923	0	**
S-A-HA	miR-4497	19044002	7385833	2315	5453	121.561	738.305	2.60254	0	**
S-A-HA	miR-140-3p	19044002	7385833	47810	5429	2510.5	735.056	-1.77205	0	**
S-A-HA	miR-140	19044002	7385833	47738	5398	2506.72	730.859	-1.77814	0	**
S-A-HA	miR-23b-3p	19044002	7385833	3965	5373	208.202	727.474	1.80491	0	**
S-A-HA	miR-140*	19044002	7385833	47004	5359	2468.18	725.578	-1.76624	0	**
S-A-HA	miR-186	19044002	7385833	19710	5341	1034.97	723.141	-0.517242	2.00242e-127
S-A-HA	miR-92c	19044002	7385833	9782	5326	513.653	721.11	0.489427	3.48898e-85
S-A-HA	miR-155	19044002	7385833	18264	5278	959.042	714.611	-0.424435	3.80824e-83
S-A-HA	miR-93	19044002	7385833	15742	5276	826.612	714.341	-0.210598	1.68314e-20
S-A-HA	miR-93-5p	19044002	7385833	15820	5236	830.708	708.925	-0.228708	7.65473e-24
S-A-HA	miR-205-5p	19044002	7385833	4811	5137	252.625	695.521	1.46109	0	**
S-A-HA	miR-151-5p	19044002	7385833	12720	5107	667.927	691.459	0.0499535	0.0366366
S-A-HA	miR-127-3p	19044002	7385833	24750	5078	1299.62	687.533	-0.918592	0
S-A-HA	miR-151b	19044002	7385833	12734	5068	668.662	686.178	0.0373068	0.119016
S-A-HA	miR-152-3p	19044002	7385833	34852	5060	1830.08	685.095	-1.41753	0	**
S-A-HA	miR-30e-3p	19044002	7385833	9400	4886	493.594	661.537	0.422497	5.82241e-60
S-A-HA	miR-1a-3p	19044002	7385833	28045	4860	1472.64	658.016	-1.16221	0	**
S-A-HA	miR-199a*	19044002	7385833	9899	4429	519.796	599.662	0.206202	4.60097e-15
S-A-HA	miR-205	19044002	7385833	3904	4379	204.999	592.892	1.53215	0	**
S-A-HA	miR-99a-5p	19044002	7385833	11250	4369	590.737	591.538	0.00195414	0.93527
S-A-HA	miR-99a	19044002	7385833	13186	4324	692.396	585.445	-0.242065	2.95437e-22
S-A-HA	miR-20a	19044002	7385833	7289	4260	382.745	576.78	0.591637	2.30544e-96
S-A-HA	miR-20	19044002	7385833	7256	4254	381.012	575.967	0.596149	1.50882e-97
S-A-HA	miR-142-3p	19044002	7385833	4124	4254	216.551	575.967	1.41128	0	**
S-A-HA	miR-152	19044002	7385833	29495	4237	1548.78	573.666	-1.43285	0	**
S-A-HA	miR-20a-5p	19044002	7385833	7329	4157	384.846	562.834	0.548431	3.99868e-82
S-A-HA	miR-155-5p	19044002	7385833	14709	4115	772.369	557.148	-0.471231	4.49979e-81
S-A-HA	miR-148b-3p	19044002	7385833	42285	4110	2220.38	556.471	-1.99643	0	**
S-A-HA	miR-30c-5p	19044002	7385833	3112	4058	163.411	549.43	1.74943	0	**
S-A-HA	miR-106	19044002	7385833	7203	3956	378.229	535.62	0.501949	9.90029e-67
S-A-HA	miR-30c	19044002	7385833	2969	3750	155.902	507.729	1.70342	0	**
S-A-HA	miR-106b-5p	19044002	7385833	5012	3737	263.18	505.969	0.942998	1.10496e-191
S-A-HA	miR-5126	19044002	7385833	783	3598	41.1153	487.149	3.56662	0	**
S-A-HA	miR-28-3p	19044002	7385833	17281	3551	907.425	480.785	-0.916385	4.27562e-297
S-A-HA	miR-19b	19044002	7385833	586	3515	30.7708	475.911	3.95106	0	**
S-A-HA	miR-19b-3p	19044002	7385833	551	3471	28.933	469.954	4.02173	0	**
S-A-HA	miR-716b	19044002	7385833	13882	3199	728.943	433.127	-0.751018	7.10192e-172
S-A-HA	miR-27e	19044002	7385833	1266	3138	66.4776	424.867	2.67607	0	**
S-A-HA	miR-135a	19044002	7385833	0	3108	0.01	420.806	15.3609	0	**
S-A-HA	miR-135b	19044002	7385833	1023	3107	53.7177	420.67	2.96922	0	**
S-A-HA	miR-135a-5p	19044002	7385833	1015	3097	53.2976	419.316	2.9759	0	**
S-A-HA	miR-452-5p	19044002	7385833	31398	3083	1648.71	417.421	-1.98176	0	**
S-A-HA	miR-15a	19044002	7385833	2084	3083	109.431	417.421	1.93148	0	**
S-A-HA	miR-664-5p	19044002	7385833	3076	3026	161.521	409.703	1.34286	5.8519e-279	**
S-A-HA	miR-195-5p	19044002	7385833	1355	2990	71.151	404.829	2.50836	0	**
S-A-HA	miR-15a-5p	19044002	7385833	2015	2882	105.808	390.207	1.88279	0	**
S-A-HA	miR-182-5p	19044002	7385833	15238	2878	800.147	389.665	-1.03803	2.07013505607482e-320	**
S-A-HA	miR-2462	19044002	7385833	15798	2866	829.553	388.04	-1.09613	0	**
S-A-HA	miR-2371	19044002	7385833	12129	2855	636.893	386.551	-0.720394	3.28657e-140
S-A-HA	miR-182	19044002	7385833	14776	2844	775.887	385.062	-1.01076	7.11174e-298	**
S-A-HA	miR-195	19044002	7385833	1277	2812	67.0552	380.729	2.50534	0	**
S-A-HA	miR-185-5p	19044002	7385833	6345	2782	333.176	376.667	0.177006	8.41665e-08
S-A-HA	miR-7	19044002	7385833	2089	2716	109.693	367.731	1.74518	0	**
S-A-HA	miR-10a	19044002	7385833	30216	2637	1586.64	357.035	-2.15184	0	**
S-A-HA	miR-4651	19044002	7385833	4783	2617	251.155	354.327	0.496502	6.61429e-44
S-A-HA	miR-7-5p	19044002	7385833	1997	2566	104.862	347.422	1.72819	0	**
S-A-HA	miR-10	19044002	7385833	29457	2544	1546.79	344.443	-2.16694	0	**
S-A-HA	miR-10a-5p	19044002	7385833	29452	2528	1546.52	342.277	-2.17579	0	**
S-A-HA	miR-17a	19044002	7385833	3140	2502	164.881	338.757	1.03882	7.06898e-152	**
S-A-HA	miR-106a	19044002	7385833	3127	2463	164.199	333.476	1.02214	1.52223e-145	**
S-A-HA	miR-17-5p	19044002	7385833	3164	2443	166.142	330.768	0.993409	1.25865e-137
S-A-HA	miR-374a-5p	19044002	7385833	677	2368	35.5493	320.614	3.17294	0	**
S-A-HA	miR-17	19044002	7385833	0	2330	0.01	315.469	14.9452	0	**
S-A-HA	miR-574-3p	19044002	7385833	892	2328	46.8389	315.198	2.75048	0	**
S-A-HA	miR-4444	19044002	7385833	50	2299	2.6255	311.272	6.88944	0	**
S-A-HA	miR-374a	19044002	7385833	788	2298	41.3779	311.136	2.91061	0	**
S-A-HA	miR-192-5p	19044002	7385833	13639	2288	716.183	309.782	-1.20907	0	**
S-A-HA	miR-1957	19044002	7385833	4434	2274	232.829	307.887	0.403128	1.47884e-26
S-A-HA	miR-2487	19044002	7385833	10800	2226	567.108	301.388	-0.912002	5.51962e-185
S-A-HA	miR-423-3p	19044002	7385833	10581	2215	555.608	299.899	-0.889593	4.52024e-174
S-A-HA	miR-10-5p	19044002	7385833	26347	2214	1383.48	299.763	-2.20641	0	**
S-A-HA	miR-192	19044002	7385833	13160	2203	691.031	298.274	-1.21211	0	**
S-A-HA	miR-99b-5p	19044002	7385833	19914	2193	1045.68	296.92	-1.8163	0	**
S-A-HA	miR-30f	19044002	7385833	1951	2190	102.447	296.514	1.53322	3.80189e-249	**
S-A-HA	miR-28-5p	19044002	7385833	6499	2169	341.262	293.67	-0.216684	9.144e-10
S-A-HA	miR-214-3p	19044002	7385833	102	2145	5.356	290.421	5.76085	0	**
S-A-HA	miR-98	19044002	7385833	4560	2141	239.446	289.879	0.275755	5.37755e-13
S-A-HA	miR-200b-5p	19044002	7385833	10886	2138	571.624	289.473	-0.981636	5.90748e-210
S-A-HA	miR-200b*	19044002	7385833	10649	2137	559.179	289.338	-0.950555	4.47824e-195
S-A-HA	miR-10c	19044002	7385833	10113	2137	531.033	289.338	-0.876048	2.46487e-162
S-A-HA	miR-1183	19044002	7385833	0	2100	0.01	284.328	14.7953	0	**
S-A-HA	miR-486-5p	19044002	7385833	8231	2088	432.21	282.703	-0.612442	1.15121e-72
S-A-HA	miR-15b-5p	19044002	7385833	536	1993	28.1453	269.841	3.26114	0	**
S-A-HA	miR-15b	19044002	7385833	595	1984	31.2434	268.622	3.10396	0	**
S-A-HA	miR-125a	19044002	7385833	11064	1980	580.97	268.081	-1.1158	3.46681e-261	**
S-A-HA	miR-22-3p	19044002	7385833	9157	1973	480.834	267.133	-0.84798	1.61799e-139
S-A-HA	miR-196	19044002	7385833	9190	1948	482.567	263.748	-0.871567	1.84128e-146
S-A-HA	miR-2288	19044002	7385833	2643	1924	138.784	260.499	0.908436	1.40385e-93
S-A-HA	miR-378f	19044002	7385833	917	1916	48.1516	259.416	2.42961	0	**
S-A-HA	miR-4507	19044002	7385833	4082	1904	214.346	257.791	0.266261	4.69357e-11
S-A-HA	miR-340-5p	19044002	7385833	2037	1863	106.963	252.24	1.23769	1.87056e-151	**
S-A-HA	miR-214	19044002	7385833	254	1836	13.3375	248.584	4.22017	0	**
S-A-HA	miR-2285d	19044002	7385833	5928	1781	311.279	241.137	-0.368354	4.83263e-22
S-A-HA	miR-196a-5p	19044002	7385833	8144	1747	427.641	236.534	-0.854354	7.85633e-126
S-A-HA	miR-125a-5p	19044002	7385833	2695	1734	141.514	234.774	0.730323	3.63548e-58
S-A-HA	miR-4154-3p	19044002	7385833	7810	1691	410.103	228.952	-0.840942	1.18603e-117
S-A-HA	miR-100	19044002	7385833	27490	1592	1443.5	215.548	-2.74349	0	**
S-A-HA	miR-100-5p	19044002	7385833	26922	1535	1413.67	207.83	-2.76597	0	**
S-A-HA	miR-196b	19044002	7385833	6123	1510	321.519	204.446	-0.653186	8.36605e-61
S-A-HA	miR-146	19044002	7385833	2904	1478	152.489	200.113	0.392108	5.29105e-17
S-A-HA	miR-342	19044002	7385833	604	1474	31.716	199.571	2.65362	0	**
S-A-HA	miR-342-3p	19044002	7385833	606	1428	31.821	193.343	2.60311	0	**
S-A-HA	miR-378g	19044002	7385833	1479	1409	77.6622	190.771	1.29655	6.18831e-124	**
S-A-HA	miR-652-3p	19044002	7385833	2334	1402	122.558	189.823	0.631186	7.60553e-37
S-A-HA	miR-1468	19044002	7385833	2367	1385	124.291	187.521	0.593331	1.0016e-32
S-A-HA	miR-339b	19044002	7385833	56	1357	2.9406	183.73	5.96533	0	**
S-A-HA	miR-339	19044002	7385833	589	1356	30.9284	183.595	2.56952	4.34629548646545e-319	**
S-A-HA	miR-146a	19044002	7385833	2732	1354	143.457	183.324	0.353775	3.36004e-13
S-A-HA	miR-196b-5p	19044002	7385833	5259	1273	276.15	172.357	-0.680052	3.7779e-56
S-A-HA	miR-4289	19044002	7385833	1156	1233	60.7015	166.941	1.45954	6.57871e-131	**
S-A-HA	miR-223-3p	19044002	7385833	243	1225	12.7599	165.858	3.70026	0	**
S-A-HA	miR-223	19044002	7385833	245	1222	12.8649	165.452	3.6849	0	**
S-A-HA	miR-3896-5p	19044002	7385833	3551	1151	186.463	155.839	-0.258833	8.40266e-08
S-A-HA	miR-497-5p	19044002	7385833	686	1125	36.0218	152.319	2.08015	4.29297e-201	**
S-A-HA	miR-1839	19044002	7385833	6289	1119	330.235	151.506	-1.12412	4.95523e-151	**
S-A-HA	miR-130a	19044002	7385833	654	1108	34.3415	150.017	2.1271	3.14483e-204	**
S-A-HA	miR-339-5p	19044002	7385833	270	1101	14.1777	149.069	3.39429	0	**
S-A-HA	miR-181b	19044002	7385833	8151	1087	428.009	147.174	-1.54012	6.37415270875841e-311	**
S-A-HA	miR-221	19044002	7385833	1623	1083	85.2237	146.632	0.782874	1.2052e-41
S-A-HA	miR-4451	19044002	7385833	411	1080	21.5816	146.226	2.76033	1.25352e-277	**
S-A-HA	miR-497	19044002	7385833	724	1060	38.0172	143.518	1.91651	4.32394e-169	**
S-A-HA	miR-744-5p	19044002	7385833	3529	1050	185.308	142.164	-0.382366	1.31296e-14
S-A-HA	miR-224-5p	19044002	7385833	2248	1041	118.042	140.946	0.255832	2.77009e-06
S-A-HA	miR-224	19044002	7385833	2233	1038	117.255	140.539	0.261327	1.78031e-06
S-A-HA	miR-3586-3p	19044002	7385833	5003	1034	262.707	139.998	-0.908054	4.25248e-86
S-A-HA	miR-4205-5p	19044002	7385833	6023	1021	316.268	138.238	-1.194	1.00887e-158	**
S-A-HA	miR-361-5p	19044002	7385833	1020	1007	53.5602	136.342	1.348	8.53298e-95	**
S-A-HA	miR-19a	19044002	7385833	210	994	11.0271	134.582	3.60936	0	**
S-A-HA	miR-652	19044002	7385833	1732	987	90.9473	133.634	0.555187	2.8768e-21
S-A-HA	miR-19a-3p	19044002	7385833	192	971	10.0819	131.468	3.70487	0	**
S-A-HA	miR-181b-5p	19044002	7385833	6701	961	351.869	130.114	-1.43526	1.35073e-231	**
S-A-HA	miR-424	19044002	7385833	934	923	49.0443	124.969	1.34941	3.38591e-87	**
S-A-HA	miR-2284a	19044002	7385833	15	922	0.7876	124.834	7.30833	0	**
S-A-HA	miR-374	19044002	7385833	1247	901	65.4799	121.99	0.897642	6.06198e-44
S-A-HA	miR-320b	19044002	7385833	556	897	29.1955	121.449	2.05653	2.88956e-158	**
S-A-HA	miR-753c	19044002	7385833	0	890	0.01	120.501	13.5568	0	**
S-A-HA	miR-130a-3p	19044002	7385833	644	888	33.8164	120.23	1.83	6.29818e-133	**
S-A-HA	miR-429	19044002	7385833	4903	883	257.456	119.553	-1.10668	2.4066e-115	**
S-A-HA	miR-376c	19044002	7385833	156	880	8.1916	119.147	3.86245	3.74501759547665e-321	**
S-A-HA	miR-196c	19044002	7385833	2	871	0.105	117.928	10.1333	0	**
S-A-HA	miR-424-5p	19044002	7385833	904	870	47.469	117.793	1.3112	1.1377e-78	**
S-A-HA	miR-127	19044002	7385833	5022	858	263.705	116.168	-1.18271	9.29352e-131	**
S-A-HA	miR-5109	19044002	7385833	6582	852	345.621	115.356	-1.5831	2.79892e-261	**
S-A-HA	miR-139-3p	19044002	7385833	733	850	38.4898	115.085	1.58015	1.49388e-102	**
S-A-HA	miR-375b	19044002	7385833	28	848	1.4703	114.814	6.28705	0	**
S-A-HA	miR-429-3p	19044002	7385833	4677	843	245.589	114.137	-1.10547	6.27579e-110	**
S-A-HA	miR-130b	19044002	7385833	580	833	30.4558	112.784	1.88877	1.34603e-130	**
S-A-HA	miR-193a	19044002	7385833	0	825	0.01	111.7	13.4473	0	**
S-A-HA	miR-3613-5p	19044002	7385833	397	824	20.8465	111.565	2.42001	1.197e-180	**
S-A-HA	miR-183-5p	19044002	7385833	4443	819	233.302	110.888	-1.07309	8.06887e-100	**
S-A-HA	miR-422a	19044002	7385833	1098	817	57.6559	110.617	0.940036	3.40871e-43
S-A-HA	miR-190b	19044002	7385833	10	801	0.5251	108.451	7.69023	0	**
S-A-HA	miR-193	19044002	7385833	28	800	1.4703	108.316	6.20299	0	**
S-A-HA	miR-183	19044002	7385833	4287	788	225.11	106.691	-1.0772	5.96611e-97	**
S-A-HA	miR-3431	19044002	7385833	1718	783	90.2121	106.014	0.232859	0.000202135
S-A-HA	miR-190-5p	19044002	7385833	1259	777	66.1101	105.201	0.670211	2.04483e-23
S-A-HA	miR-4634	19044002	7385833	517	776	27.1477	105.066	1.95239	1.22326e-127	**
S-A-HA	miR-193-3p	19044002	7385833	59	776	3.0981	105.066	5.08377	0	**
S-A-HA	miR-190a	19044002	7385833	1169	770	61.3842	104.254	0.764158	6.34192e-29
S-A-HA	miR-150-5p	19044002	7385833	418	768	21.9492	103.983	2.24411	8.79127e-153	**
S-A-HA	miR-221-3p	19044002	7385833	1209	763	63.4846	103.306	0.702444	6.57922e-25
S-A-HA	miR-2284x	19044002	7385833	4081	744	214.293	100.733	-1.08904	5.89521e-94	**
S-A-HA	miR-17-3p	19044002	7385833	1395	743	73.2514	100.598	0.457673	6.26611e-12
S-A-HA	miR-375-3p	19044002	7385833	81	742	4.2533	100.463	4.56193	0	**
S-A-HA	miR-2284k	19044002	7385833	4155	738	218.179	99.921	-1.12665	9.26208e-101	**
S-A-HA	miR-2303	19044002	7385833	0	724	0.01	98.0255	13.2589	0	**
S-A-HA	miR-2284d	19044002	7385833	4090	719	214.766	97.3485	-1.14153	3.17239e-101	**
S-A-HA	miR-1285	19044002	7385833	2914	717	153.014	97.0777	-0.656453	4.65399e-30
S-A-HA	miR-2779	19044002	7385833	2645	707	138.889	95.7238	-0.536982	1.03314e-19
S-A-HA	miR-1755	19044002	7385833	2619	675	137.524	91.3912	-0.589552	8.84679e-23
S-A-HA	miR-150	19044002	7385833	369	672	19.3762	90.985	2.23134	6.15561e-133	**
S-A-HA	miR-4508	19044002	7385833	1367	658	71.7811	89.0895	0.311651	6.62632e-06
S-A-HA	miR-4621	19044002	7385833	3511	653	184.363	88.4125	-1.06022	8.65545e-78	**
S-A-HA	miR-32	19044002	7385833	662	641	34.7616	86.7878	1.32	4.4035e-59	**
S-A-HA	miR-2476	19044002	7385833	1381	636	72.5163	86.1108	0.247889	0.00037159
S-A-HA	miR-32-5p	19044002	7385833	645	625	33.8689	84.6215	1.32106	9.97448e-58	**
S-A-HA	miR-1422f*	19044002	7385833	0	624	0.01	84.4861	13.0445	0	**
S-A-HA	miR-5115	19044002	7385833	6598	605	346.461	81.9136	-2.08052	0	**
S-A-HA	miR-4110-5p	19044002	7385833	3022	599	158.685	81.1012	-0.968372	2.42278e-58
S-A-HA	miR-199a-5p	19044002	7385833	928	598	48.7293	80.9658	0.732523	2.65568e-21
S-A-HA	miR-199b	19044002	7385833	12295	596	645.61	80.695	-3.00011	0	**
S-A-HA	miR-30c-2-3p	19044002	7385833	1811	584	95.0956	79.0703	-0.266243	8.73498e-05
S-A-HA	miR-199b-5p	19044002	7385833	524	568	27.5152	76.904	1.48283	7.27207e-63	**
S-A-HA	miR-144-3p	19044002	7385833	92	563	4.8309	76.227	3.97994	1.26151e-211	**
S-A-HA	miR-221-5p	19044002	7385833	704	549	36.967	74.3315	1.00774	3.89402e-33	**
S-A-HA	miR-2723	19044002	7385833	0	549	0.01	74.3315	12.8598	5.87215e-305	**
S-A-HA	miR-532-5p	19044002	7385833	2521	547	132.378	74.0607	-0.837879	6.30544e-39
S-A-HA	miR-574-5p	19044002	7385833	716	535	37.5971	72.436	0.946086	3.39232e-29
S-A-HA	miR-221*	19044002	7385833	675	531	35.4442	71.8944	1.02033	9.33544e-33	**
S-A-HA	miR-660	19044002	7385833	2216	523	116.362	70.8112	-0.716572	8.88428e-27
S-A-HA	miR-9a-5p	19044002	7385833	226	503	11.8673	68.1034	2.52074	6.75703e-117	**
S-A-HA	miR-670	19044002	7385833	989	497	51.9324	67.291	0.373779	3.24308e-06
S-A-HA	miR-1013-3p	19044002	7385833	1923	494	100.977	66.8848	-0.594272	2.38048e-17
S-A-HA	miR-144	19044002	7385833	81	490	4.2533	66.3432	3.96329	8.66539e-184	**
S-A-HA	miR-24b	19044002	7385833	551	489	28.933	66.2078	1.19429	6.30714e-39	**
S-A-HA	miR-885-5p	19044002	7385833	254	481	13.3375	65.1247	2.28772	6.62854e-99	**
S-A-HA	miR-194-5p	19044002	7385833	1390	477	72.9889	64.5831	-0.17652	0.0207635
S-A-HA	miR-9	19044002	7385833	220	476	11.5522	64.4477	2.47996	1.65452e-108	**
S-A-HA	miR-664-3p	19044002	7385833	168	475	8.8217	64.3123	2.86597	9.47819e-129	**
S-A-HA	miR-285-3p	19044002	7385833	58	475	3.0456	64.3123	4.4003	8.67983e-194	**
S-A-HA	miR-194a	19044002	7385833	1358	470	71.3085	63.6353	-0.164247	0.0331384
S-A-HA	miR-2904	19044002	7385833	3766	466	197.753	63.0938	-1.64813	8.23912e-159	**
S-A-HA	miR-3960	19044002	7385833	617	466	32.3987	63.0938	0.961562	2.49216e-26
S-A-HA	miR-194	19044002	7385833	1355	464	71.151	62.823	-0.179591	0.0202806
S-A-HA	miR-9a	19044002	7385833	217	463	11.3947	62.6876	2.45982	1.58143e-104	**
S-A-HA	miR-660-5p	19044002	7385833	1997	460	104.862	62.2814	-0.751624	3.22273e-26
S-A-HA	miR-33a	19044002	7385833	435	460	22.8418	62.2814	1.44713	2.05572e-49	**
S-A-HA	miR-193a-5p	19044002	7385833	1686	459	88.5318	62.146	-0.510534	4.32935e-12
S-A-HA	miR-33a-5p	19044002	7385833	428	459	22.4743	62.146	1.46739	2.32682e-50	**
S-A-HA	miR-33	19044002	7385833	447	447	23.472	60.5213	1.3665	4.78682e-44	**
S-A-HA	miR-1246	19044002	7385833	1222	446	64.1672	60.3859	-0.0876243	0.277279
S-A-HA	miR-22-5p	19044002	7385833	191	438	10.0294	59.3027	2.56386	3.36134e-104	**
S-A-HA	miR-193*	19044002	7385833	1657	434	87.009	58.7611	-0.566303	4.92213e-14
S-A-HA	miR-22*	19044002	7385833	200	431	10.502	58.355	2.47419	3.75108e-98	**
S-A-HA	miR-2162-3p	19044002	7385833	2376	430	124.764	58.2196	-1.09962	2.98245e-56	**
S-A-HA	miR-139*	19044002	7385833	317	426	16.6457	57.678	1.79287	6.19368e-63	**
S-A-HA	miR-2955	19044002	7385833	3212	421	168.662	57.001	-1.56508	1.88413e-126	**
S-A-HA	miR-106b-3p	19044002	7385833	1029	416	54.0328	56.324	0.0599143	0.465661
S-A-HA	miR-140-5p	19044002	7385833	1369	415	71.8862	56.1887	-0.355435	7.69892e-06
S-A-HA	miR-143-5p	19044002	7385833	472	411	24.7847	55.6471	1.16686	8.02089e-32	**
S-A-HA	miR-33-5p	19044002	7385833	420	407	22.0542	55.1055	1.32114	3.08932e-38	**
S-A-HA	miR-145*	19044002	7385833	1637	405	85.9588	54.8347	-0.648556	3.1768e-17
S-A-HA	miR-1827	19044002	7385833	2895	402	152.016	54.4285	-1.48179	8.95266e-106	**
S-A-HA	miR-143*	19044002	7385833	6	399	0.3151	54.0223	7.4216	5.61378e-210	**
S-A-HA	miR-484	19044002	7385833	243	386	12.7599	52.2622	2.03415	3.20431e-68	**
S-A-HA	miR-142-5p	19044002	7385833	409	383	21.4766	51.856	1.27175	4.94552e-34	**
S-A-HA	miR-142	19044002	7385833	434	380	22.7893	51.4499	1.17481	7.21041e-30	**
S-A-HA	miR-374a*	19044002	7385833	2543	376	133.533	50.9083	-1.39122	3.72427e-85	**
S-A-HA	miR-4466	19044002	7385833	127	376	6.6688	50.9083	2.9324	5.18594e-105	**
S-A-HA	miR-1961	19044002	7385833	77	364	4.0433	49.2835	3.6075	5.72917e-126	**
S-A-HA	miR-136-5p	19044002	7385833	247	362	12.97	49.0128	1.91798	4.0832e-59	**
S-A-HA	miR-142b	19044002	7385833	236	356	12.3924	48.2004	1.95959	6.37604e-60	**
S-A-HA	miR-18a-5p	19044002	7385833	243	355	12.7599	48.065	1.91337	8.16011e-58	**
S-A-HA	miR-3201	19044002	7385833	1221	352	64.1147	47.6588	-0.427913	5.32106e-07
S-A-HA	miR-2478	19044002	7385833	944	350	49.5694	47.388	-0.064928	0.482088
S-A-HA	miR-18a	19044002	7385833	18	346	0.9452	46.8464	5.63117	5.56566e-165	**
S-A-HA	miR-493-5p	19044002	7385833	2105	345	110.534	46.711	-1.24265	4.44617e-60	**
S-A-HA	miR-3535	19044002	7385833	2323	343	121.981	46.4403	-1.3932	4.25976e-78	**
S-A-HA	miR-19c	19044002	7385833	5	335	0.2625	45.3571	7.43287	1.32477e-176	**
S-A-HA	miR-210	19044002	7385833	301	320	15.8055	43.3262	1.45481	3.33028e-35	**
S-A-HA	miR-462	19044002	7385833	0	319	0.01	43.1908	12.0765	1.31414e-177	**
S-A-HA	miR-4028-3p	19044002	7385833	2388	318	125.394	43.0554	-1.5422	1.44229e-92	**
S-A-HA	miR-5097	19044002	7385833	1245	311	65.3749	42.1076	-0.634656	5.31076e-13
S-A-HA	miR-146a-3p	19044002	7385833	836	305	43.8983	41.2953	-0.0881875	0.369143
S-A-HA	miR-382	19044002	7385833	265	305	13.9151	41.2953	1.56933	1.26007e-37	**
S-A-HA	miR-144-5p	19044002	7385833	3621	303	190.139	41.0245	-2.21249	8.03122e-222	**
S-A-HA	miR-4454	19044002	7385833	169	303	8.8742	41.0245	2.2088	3.26072e-60	**
S-A-HA	miR-4505	19044002	7385833	6	303	0.3151	41.0245	7.02453	1.57312e-157	**
S-A-HA	miR-139-5p	19044002	7385833	409	300	21.4766	40.6183	0.919364	2.3726e-16
S-A-HA	miR-362-5p	19044002	7385833	369	299	19.3762	40.4829	1.06303	1.90961e-20	**
S-A-HA	miR-139	19044002	7385833	288	293	15.1229	39.6705	1.39133	2.70882e-30	**
S-A-HA	miR-222-3p	19044002	7385833	406	290	21.319	39.2644	0.881082	7.6812e-15
S-A-HA	miR-200a*	19044002	7385833	808	289	42.4281	39.129	-0.116782	0.242873
S-A-HA	miR-148a-5p	19044002	7385833	2511	288	131.852	38.9936	-1.75762	5.28287e-116	**
S-A-HA	miR-4492	19044002	7385833	1241	288	65.1649	38.9936	-0.740858	1.72458e-16
S-A-HA	miR-1260a	19044002	7385833	170	288	8.9267	38.9936	2.12704	1.51289e-54	**
S-A-HA	miR-382-5p	19044002	7385833	1203	287	63.1695	38.8582	-0.701009	1.03224e-14
S-A-HA	miR-200a-5p	19044002	7385833	822	287	43.1632	38.8582	-0.151583	0.127393
S-A-HA	miR-34a-5p	19044002	7385833	115	287	6.0386	38.8582	2.68593	6.86512e-73	**
S-A-HA	miR-369-3p	19044002	7385833	495	284	25.9924	38.452	0.564969	2.29622e-07
S-A-HA	miR-582-5p	19044002	7385833	147	280	7.719	37.9104	2.29611	1.17831e-58	**
S-A-HA	miR-34b	19044002	7385833	120	279	6.3012	37.775	2.58373	1.04943e-67	**
S-A-HA	miR-100a	19044002	7385833	25942	278	1362.21	37.6396	-5.17756	0	**
S-A-HA	miR-3563-3p	19044002	7385833	380	278	19.9538	37.6396	0.915588	3.59209e-15
S-A-HA	miR-222	19044002	7385833	273	277	14.3352	37.5042	1.38749	1.29121e-28	**
S-A-HA	miR-2411	19044002	7385833	297	276	15.5955	37.3688	1.2607	1.1142e-24	**
S-A-HA	miR-2966	19044002	7385833	55	274	2.888	37.098	3.6832	3.83785e-97	**
S-A-HA	miR-708-5p	19044002	7385833	643	273	33.7639	36.9627	0.130589	0.205555
S-A-HA	miR-3968	19044002	7385833	406	269	21.319	36.4211	0.772635	2.49911e-11
S-A-HA	miR-362	19044002	7385833	366	269	19.2186	36.4211	0.922271	6.74162e-15
S-A-HA	miR-2886	19044002	7385833	355	269	18.641	36.4211	0.966295	5.16188e-16
S-A-HA	miR-542-3p	19044002	7385833	3454	268	181.369	36.2857	-2.32146	9.89522e-224	**
S-A-HA	miR-381	19044002	7385833	903	267	47.4165	36.1503	-0.391382	7.31248e-05
S-A-HA	miR-299*	19044002	7385833	356	265	18.6935	35.8795	0.940623	3.73124e-15
S-A-HA	miR-130b-3p	19044002	7385833	225	260	11.8147	35.2025	1.57509	1.64667e-32	**
S-A-HA	miR-485-5p	19044002	7385833	207	257	10.8696	34.7963	1.67864	2.9991e-35	**
S-A-HA	miR-376e-3p	19044002	7385833	188	253	9.8719	34.2548	1.79491	3.46736e-38	**
S-A-HA	miR-299-3p	19044002	7385833	342	252	17.9584	34.1194	0.925933	3.84718e-14
S-A-HA	miR-363	19044002	7385833	97	250	5.0935	33.8486	2.73237	5.00822e-65	**
S-A-HA	miR-485	19044002	7385833	189	247	9.9244	33.4424	1.75263	4.30919e-36	**
S-A-HA	miR-4330	19044002	7385833	0	247	0.01	33.4424	11.7075	9.65335e-138	**
S-A-HA	miR-34a	19044002	7385833	87	246	4.5684	33.307	2.86606	1.29326e-67	**
S-A-HA	miR-148b-5p	19044002	7385833	1242	245	65.2174	33.1716	-0.975308	3.40871e-25
S-A-HA	miR-582	19044002	7385833	126	245	6.6163	33.1716	2.32585	2.08243e-52	**
S-A-HA	miR-29a-5p	19044002	7385833	155	243	8.139	32.9008	2.0152	4.31545e-43	**
S-A-HA	miR-31-5p	19044002	7385833	290	242	15.2279	32.7654	1.10546	6.755e-18	**
S-A-HA	miR-455-3p	19044002	7385833	61	240	3.2031	32.4946	3.34266	9.33452e-78	**
S-A-HA	miR-4510	19044002	7385833	1798	239	94.4129	32.3592	-1.54481	2.78682e-70	**
S-A-HA	miR-136-3p	19044002	7385833	375	239	19.6912	32.3592	0.716625	3.95635e-09
S-A-HA	miR-500	19044002	7385833	522	231	27.4102	31.2761	0.190348	0.0934903
S-A-HA	miR-2354	19044002	7385833	274	231	14.3877	31.2761	1.12022	1.6605e-17	**
S-A-HA	miR-2982	19044002	7385833	11	230	0.5776	31.1407	5.75259	2.29346e-111	**
S-A-HA	miR-501-3p	19044002	7385833	519	229	27.2527	31.0053	0.186116	0.102137
S-A-HA	miR-335	19044002	7385833	167	228	8.7692	30.8699	1.81568	3.77749e-35	**
S-A-HA	miR-493	19044002	7385833	1673	227	87.8492	30.7345	-1.51517	8.67684e-64	**
S-A-HA	miR-2136	19044002	7385833	1254	226	65.8475	30.5991	-1.10564	1.06767e-30	**
S-A-HA	miR-1648*	19044002	7385833	10	224	0.5251	30.3283	5.85193	2.34646e-109	**
S-A-HA	miR-409-3p	19044002	7385833	805	222	42.2705	30.0575	-0.491926	3.92516e-06
S-A-HA	miR-1290	19044002	7385833	373	216	19.5862	29.2452	0.578362	3.93973e-06
S-A-HA	miR-345-5p	19044002	7385833	54	216	2.8355	29.2452	3.36652	1.15541e-70	**
S-A-HA	miR-452-3p	19044002	7385833	380	214	19.9538	28.9744	0.538115	1.70345e-05
S-A-HA	miR-503	19044002	7385833	371	214	19.4812	28.9744	0.572696	5.30522e-06
S-A-HA	miR-22	19044002	7385833	784	212	41.1678	28.7036	-0.520285	1.66144e-06
S-A-HA	miR-197-3p	19044002	7385833	260	212	13.6526	28.7036	1.07206	3.70081e-15	**
S-A-HA	miR-432-5p	19044002	7385833	958	209	50.3046	28.2974	-0.830021	1.63805e-15
S-A-HA	miR-29c-5p	19044002	7385833	118	209	6.1962	28.2974	2.19121	1.13521e-41	**
S-A-HA	miR-31	19044002	7385833	225	207	11.8147	28.0266	1.24621	1.33154e-18	**
S-A-HA	miR-15c	19044002	7385833	0	206	0.01	27.8912	11.4456	4.8548e-115	**
S-A-HA	miR-362-3p	19044002	7385833	14	205	0.7351	27.7558	5.2387	8.48705e-95	**
S-A-HA	miR-500a-3p	19044002	7385833	433	204	22.7368	27.6204	0.280705	0.022217
S-A-HA	miR-338	19044002	7385833	191	203	10.0294	27.4851	1.45441	5.91466e-23	**
S-A-HA	miR-106a-5p	19044002	7385833	116	203	6.0912	27.4851	2.17385	4.12835e-40	**
S-A-HA	miR-300-3p	19044002	7385833	879	201	46.1563	27.2143	-0.762163	1.27322e-12
S-A-HA	miR-376b	19044002	7385833	48	197	2.5205	26.6727	3.40358	2.61341e-65	**
S-A-HA	miR-502-3p	19044002	7385833	425	196	22.3167	26.5373	0.249898	0.0446571
S-A-HA	miR-4707-5p	19044002	7385833	759	194	39.8551	26.2665	-0.60154	8.08565e-08
S-A-HA	miR-499a-5p	19044002	7385833	85	194	4.4633	26.2665	2.55704	4.70743e-47	**
S-A-HA	miR-3473b	19044002	7385833	0	193	0.01	26.1311	11.3516	7.6596e-108	**
S-A-HA	miR-493-3p	19044002	7385833	1443	191	75.7719	25.8603	-1.55092	4.87971e-57	**
S-A-HA	miR-1260b	19044002	7385833	57	187	2.9931	25.3187	3.08049	4.42595e-56	**
S-A-HA	miR-1892	19044002	7385833	193	186	10.1344	25.1833	1.31321	3.09317e-18	**
S-A-HA	miR-125b-2-3p	19044002	7385833	1618	185	84.9611	25.048	-1.76211	1.31835e-75	**
S-A-HA	miR-184	19044002	7385833	369	185	19.3762	25.048	0.37041	0.00464115
S-A-HA	miR-338-3p	19044002	7385833	217	185	11.3947	25.048	1.13633	1.20442e-14	**
S-A-HA	miR-499	19044002	7385833	84	185	4.4108	25.048	2.50558	7.22569e-44	**
S-A-HA	miR-3962	19044002	7385833	392	182	20.5839	24.6418	0.259591	0.0446543
S-A-HA	miR-328a	19044002	7385833	227	181	11.9198	24.5064	1.0398	1.3869e-12	**
S-A-HA	miR-432	19044002	7385833	693	180	36.3894	24.371	-0.578353	7.47517e-07
S-A-HA	miR-184-3p	19044002	7385833	351	179	18.431	24.2356	0.394993	0.00309679
S-A-HA	miR-2285b	19044002	7385833	659	175	34.6041	23.694	-0.546421	4.5258e-06
S-A-HA	miR-125b*	19044002	7385833	1467	174	77.0321	23.5586	-1.70921	5.06174e-66	**
S-A-HA	miR-1934-3p	19044002	7385833	249	172	13.075	23.2878	0.832763	1.14292e-08
S-A-HA	miR-425	19044002	7385833	515	171	27.0426	23.1524	-0.224072	0.0792379
S-A-HA	miR-31b	19044002	7385833	207	171	10.8696	23.1524	1.09086	7.43335e-13	**
S-A-HA	miR-2298	19044002	7385833	10	170	0.5251	23.017	5.45396	1.29663e-80	**
S-A-HA	miR-425-5p	19044002	7385833	530	166	27.8303	22.4755	-0.308303	0.0155712
S-A-HA	miR-2285c	19044002	7385833	116	166	6.0912	22.4755	1.88355	2.11399e-27	**
S-A-HA	miR-145-3p	19044002	7385833	1423	165	74.7217	22.3401	-1.74189	1.06315e-65	**
S-A-HA	miR-203-3p	19044002	7385833	1596	163	83.8059	22.0693	-1.92501	1.67268e-83	**
S-A-HA	miR-455*	19044002	7385833	56	162	2.9406	21.9339	2.89898	1.00409e-45	**
S-A-HA	miR-345-3p	19044002	7385833	842	161	44.2134	21.7985	-1.02025	9.16342e-19	**
S-A-HA	miR-3959-5p	19044002	7385833	116	159	6.0912	21.5277	1.8214	3.81474e-25	**
S-A-HA	miR-494	19044002	7385833	189	158	9.9244	21.3923	1.10804	2.83984e-12	**
S-A-HA	miR-981	19044002	7385833	0	157	0.01	21.2569	11.0537	6.56485e-88	**
S-A-HA	miR-720	19044002	7385833	309	156	16.2256	21.1215	0.38044	0.0075943
S-A-HA	miR-5100	19044002	7385833	118	156	6.1962	21.1215	1.76926	9.7091e-24	**
S-A-HA	miR-223-5p	19044002	7385833	152	154	7.9815	20.8507	1.38536	1.30381e-16	**
S-A-HA	miR-1261	19044002	7385833	30663	151	1610.11	20.4445	-6.29931	0	**
S-A-HA	miR-1207-5p	19044002	7385833	122	147	6.4062	19.903	1.63545	3.75999e-20	**
S-A-HA	miR-3488	19044002	7385833	29	146	1.5228	19.7676	3.69834	8.45054e-53	**
S-A-HA	miR-3652	19044002	7385833	4	146	0.21	19.7676	6.5566	4.58557e-75	**
S-A-HA	miR-144*	19044002	7385833	1464	144	76.8746	19.4968	-1.97927	2.02779e-79	**
S-A-HA	miR-3976	19044002	7385833	1025	143	53.8227	19.3614	-1.47503	2.84447e-38	**
S-A-HA	lin-4-3p	19044002	7385833	0	142	0.01	19.226	10.9088	1.32632e-79	**
S-A-HA	miR-3965	19044002	7385833	173	141	9.0842	19.0906	1.07143	1.376e-10	**
S-A-HA	miR-152a	19044002	7385833	322	139	16.9082	18.8198	0.154528	0.281681
S-A-HA	miR-142*	19044002	7385833	70	139	3.6757	18.8198	2.35616	5.36573e-31	**
S-A-HA	miR-380-3p	19044002	7385833	228	137	11.9723	18.549	0.631641	6.59429e-05
S-A-HA	miR-532-3p	19044002	7385833	148	137	7.7715	18.549	1.25508	5.57329e-13	**
S-A-HA	miR-128-3p	19044002	7385833	362	136	19.0086	18.4136	-0.0458806	0.774023
S-A-HA	miR-877-5p	19044002	7385833	105	136	5.5135	18.4136	1.73973	1.95557e-20	**
S-A-HA	miR-149-3p	19044002	7385833	93	136	4.8834	18.4136	1.91481	2.91485e-23	**
S-A-HA	miR-1307-3p	19044002	7385833	692	134	36.3369	18.1428	-1.00204	2.84949e-15	**
S-A-HA	miR-4298	19044002	7385833	140	134	7.3514	18.1428	1.30331	1.94646e-13	**
S-A-HA	miR-99a*	19044002	7385833	2	134	0.105	18.1428	7.43286	1.73478e-71	**
S-A-HA	miR-628-3p	19044002	7385833	12	127	0.6301	17.1951	4.77027	3.96785e-56	**
S-A-HA	miR-7-1-3p	19044002	7385833	63	125	3.3081	16.9243	2.35502	4.95748e-28	**
S-A-HA	miR-345	19044002	7385833	791	123	41.5354	16.6535	-1.31852	1.33328e-25	**
S-A-HA	miR-7*	19044002	7385833	13	122	0.6826	16.5181	4.59686	1.11888e-52	**
S-A-HA	miR-1692	19044002	7385833	2060	121	108.171	16.3827	-2.72306	4.37503e-159	**
S-A-HA	miR-133-3p	19044002	7385833	56	121	2.9406	16.3827	2.47799	6.48219e-29	**
S-A-HA	miR-330-3p	19044002	7385833	125	120	6.5637	16.2473	1.30762	2.9806e-12	**
S-A-HA	miR-133a	19044002	7385833	0	119	0.01	16.1119	10.6539	7.205e-67	**
S-A-HA	miR-133a-3p	19044002	7385833	58	118	3.0456	15.9765	2.39115	4.70375e-27	**
S-A-HA	miR-4448	19044002	7385833	1208	115	63.432	15.5703	-2.02641	9.98334e-68	**
S-A-HA	miR-133	19044002	7385833	53	115	2.783	15.5703	2.48408	1.20444e-27	**
S-A-HA	miR-4943-5p	19044002	7385833	0	113	0.01	15.2996	10.5793	1.51288e-63	**
S-A-HA	miR-154b-5p	19044002	7385833	114	112	5.9861	15.1642	1.34098	5.93895e-12	**
S-A-HA	miR-582-3p	19044002	7385833	187	111	9.8194	15.0288	0.614023	0.000453064
S-A-HA	miR-146b-3p	19044002	7385833	578	110	30.3508	14.8934	-1.02706	1.88799e-13	**
S-A-HA	miR-421	19044002	7385833	50	110	2.6255	14.8934	2.50401	9.05888e-27	**
S-A-HA	miR-299-5p	19044002	7385833	22	110	1.1552	14.8934	3.68846	4.16035e-40	**
S-A-HA	miR-299	19044002	7385833	20	110	1.0502	14.8934	3.82594	2.09312e-41	**
S-A-HA	miR-206	19044002	7385833	146	107	7.6665	14.4872	0.918139	9.084e-07
S-A-HA	miR-2285a	19044002	7385833	302	106	15.858	14.3518	-0.143979	0.391525
S-A-HA	miR-378a-5p	19044002	7385833	254	106	13.3375	14.3518	0.105743	0.506828
S-A-HA	miR-2551	19044002	7385833	564	105	29.6156	14.2164	-1.0588	9.6962e-14	**
S-A-HA	miR-99a-3p	19044002	7385833	142	105	7.4564	14.2164	0.931005	8.509e-07
S-A-HA	miR-1277-5p	19044002	7385833	96	104	5.041	14.081	1.48197	7.14543e-13	**
S-A-HA	miR-4488	19044002	7385833	493	103	25.8874	13.9456	-0.89244	1.42076e-09
S-A-HA	miR-1271	19044002	7385833	147	103	7.719	13.9456	0.853324	6.07491e-06
S-A-HA	miR-128	19044002	7385833	246	101	12.9175	13.6748	0.0821928	0.607057
S-A-HA	miR-206-3p	19044002	7385833	144	101	7.5614	13.6748	0.854794	7.22871e-06
S-A-HA	miR-71	19044002	7385833	118	101	6.1962	13.6748	1.14206	9.63908e-09	**
S-A-HA	miR-663a	19044002	7385833	3	101	0.1575	13.6748	6.44002	4.73105e-52	**
S-A-HA	miR-322	19044002	7385833	0	101	0.01	13.6748	10.4173	6.67027e-57	**
S-A-HA	miR-148	19044002	7385833	1035	99	54.3478	13.404	-2.01956	5.12103e-58	**
S-A-HA	miR-3135b	19044002	7385833	339	99	17.8009	13.404	-0.409287	0.0120714
S-A-HA	miR-514	19044002	7385833	328	99	17.2233	13.404	-0.361698	0.0279342
S-A-HA	miR-340-3p	19044002	7385833	221	99	11.6047	13.404	0.207954	0.224562
S-A-HA	miR-92	19044002	7385833	211	98	11.0796	13.2686	0.26011	0.135756
S-A-HA	miR-582*	19044002	7385833	151	97	7.929	13.1333	0.728019	0.000132817
S-A-HA	miR-3963	19044002	7385833	413	96	21.6866	12.9979	-0.738525	2.40727e-06
S-A-HA	miR-4485	19044002	7385833	0	96	0.01	12.9979	10.3441	3.91398e-54	**
S-A-HA	miR-34c	19044002	7385833	1094	95	57.4459	12.8625	-2.15903	2.75229e-66	**
S-A-HA	miR-1388	19044002	7385833	60	95	3.1506	12.8625	2.02947	4.79711e-18	**
S-A-HA	miR-34c-5p	19044002	7385833	1096	94	57.5509	12.7271	-2.17693	4.79518e-67	**
S-A-HA	miR-7a-1*	19044002	7385833	0	94	0.01	12.7271	10.3137	5.01196e-53	**
S-A-HA	miR-3176	19044002	7385833	3370	93	176.959	12.5917	-3.81287	0	**
S-A-HA	miR-127-5p	19044002	7385833	479	93	25.1523	12.5917	-0.998217	6.21137e-11
S-A-HA	let-7	19044002	7385833	345	93	18.1159	12.5917	-0.524783	0.00146351
S-A-HA	miR-3958-3p	19044002	7385833	331	93	17.3808	12.5917	-0.465021	0.00527164
S-A-HA	miR-20b	19044002	7385833	169	93	8.8742	12.5917	0.504784	0.00709916
S-A-HA	miR-331-5p	19044002	7385833	249	91	13.075	12.3209	-0.0857033	0.652303
S-A-HA	miR-1654	19044002	7385833	75	91	3.9382	12.3209	1.6455	3.42353e-13	**
S-A-HA	miR-181a-3p	19044002	7385833	448	89	23.5245	12.0501	-0.965119	7.73856e-10
S-A-HA	let-7d-3p	19044002	7385833	149	89	7.824	12.0501	0.623067	0.00143006
S-A-HA	miR-1307-5p	19044002	7385833	120	89	6.3012	12.0501	0.935347	5.22674e-06
S-A-HA	miR-3645-3p	19044002	7385833	0	89	0.01	12.0501	10.2348	2.94092e-50	**
S-A-HA	miR-204-5p	19044002	7385833	78	87	4.0958	11.7793	1.52404	1.92101e-11	**
S-A-HA	miR-1388-3p	19044002	7385833	640	86	33.6064	11.6439	-1.52916	1.15194e-25	**
S-A-HA	miR-361-3p	19044002	7385833	318	86	16.6982	11.6439	-0.520118	0.00246921
S-A-HA	miR-141-5p	19044002	7385833	314	86	16.4881	11.6439	-0.501851	0.00359809
S-A-HA	miR-301a-3p	19044002	7385833	52	86	2.7305	11.6439	2.09234	3.91302e-17	**
S-A-HA	miR-296	19044002	7385833	360	85	18.9036	11.5085	-0.715961	1.85614e-05
S-A-HA	miR-301a	19044002	7385833	53	85	2.783	11.5085	2.04799	1.67127e-16	**
S-A-HA	miR-4171-5p	19044002	7385833	856	84	44.9485	11.3731	-1.98265	3.44085e-47	**
S-A-HA	miR-3656	19044002	7385833	105	84	5.5135	11.3731	1.04459	1.16318e-06	**
S-A-HA	miR-5102	19044002	7385833	0	82	0.01	11.1023	10.1166	2.20977e-46	**
S-A-HA	miR-708-3p	19044002	7385833	848	81	44.5285	10.9669	-2.02157	7.16728e-48	**
S-A-HA	miR-331	19044002	7385833	108	80	5.6711	10.8315	0.933533	1.59504e-05
S-A-HA	miR-146c	19044002	7385833	79	80	4.1483	10.8315	1.38464	2.31945e-09	**
S-A-HA	miR-671-5p	19044002	7385833	290	79	15.2279	10.6962	-0.509619	0.00459379
S-A-HA	miR-628-5p	19044002	7385833	446	77	23.4194	10.4254	-1.1676	9.25892e-13	**
S-A-HA	miR-500a-5p	19044002	7385833	75	77	3.9382	10.4254	1.40449	3.07073e-09	**
S-A-HA	miR-193b-3p	19044002	7385833	52	77	2.7305	10.4254	1.93287	4.87339e-14	**
S-A-HA	miR-1273g-3p	19044002	7385833	789	76	41.4304	10.29	-2.00945	2.51639e-44	**
S-A-HA	miR-20a*	19044002	7385833	347	76	18.221	10.29	-0.824359	2.13575e-06
S-A-HA	miR-27c	19044002	7385833	84	76	4.4108	10.29	1.22213	1.37413e-07	**
S-A-HA	miR-1329	19044002	7385833	60	76	3.1506	10.29	1.70754	7.87089e-12	**
S-A-HA	miR-29b-2-5p	19044002	7385833	117	75	6.1437	10.1546	0.724954	0.000792192
S-A-HA	miR-1777	19044002	7385833	15	75	0.7876	10.1546	3.68853	7.21296e-28	**
S-A-HA	miR-2284u	19044002	7385833	2357	74	123.766	10.0192	-3.62678	1.94911e-234	**
S-A-HA	miR-2887	19044002	7385833	834	74	43.7933	10.0192	-2.12794	4.74534e-50	**
S-A-HA	miR-655	19044002	7385833	187	74	9.8194	10.0192	0.0290605	0.852032
S-A-HA	miR-487b	19044002	7385833	69	73	3.6232	9.8838	1.4478	3.37055e-09	**
S-A-HA	miR-92b	19044002	7385833	246	72	12.9175	9.7484	-0.40609	0.0347644
S-A-HA	miR-497-3p	19044002	7385833	188	71	9.8719	9.613	-0.0383411	0.880814
S-A-HA	miR-455b	19044002	7385833	162	71	8.5066	9.613	0.176404	0.372293
S-A-HA	miR-218-5p	19044002	7385833	131	71	6.8788	9.613	0.48283	0.0233582
S-A-HA	miR-218b	19044002	7385833	0	71	0.01	9.613	9.90884	2.72265e-40	**
S-A-HA	miR-455-5p	19044002	7385833	167	70	8.7692	9.4776	0.112077	0.559593
S-A-HA	let-7a	19044002	7385833	1019	69	53.5077	9.3422	-2.51791	2.3001e-73	**
S-A-HA	miR-1343	19044002	7385833	143	69	7.5089	9.3422	0.315161	0.130993
S-A-HA	miR-29b*	19044002	7385833	103	69	5.4085	9.3422	0.788534	0.000524412
S-A-HA	miR-503-5p	19044002	7385833	103	68	5.4085	9.2068	0.767471	0.000771781
S-A-HA	miR-324-5p	19044002	7385833	52	68	2.7305	9.2068	1.75353	4.05657e-11	**
S-A-HA	miR-33*	19044002	7385833	9	68	0.4726	9.2068	4.28401	1.25331e-28	**
S-A-HA	miR-218a	19044002	7385833	98	67	5.146	9.0714	0.817874	0.000417208
S-A-HA	miR-2226*	19044002	7385833	0	67	0.01	9.0714	9.82518	4.46449e-38	**
S-A-HA	miR-127*	19044002	7385833	374	66	19.6387	8.936	-1.136	1.61947e-10	**
S-A-HA	miR-181a*	19044002	7385833	364	66	19.1136	8.936	-1.0969	8.51419e-10	**
S-A-HA	miR-5106	19044002	7385833	206	66	10.8171	8.936	-0.275613	0.183985
S-A-HA	miR-365a-3p	19044002	7385833	19	66	0.9977	8.936	3.16295	1.93078e-21	**
S-A-HA	miR-5128	19044002	7385833	0	66	0.01	8.936	9.80349	1.5976e-37	**
S-A-HA	miR-185-3p	19044002	7385833	136	65	7.1414	8.8006	0.301395	0.158911
S-A-HA	miR-3141	19044002	7385833	20	65	1.0502	8.8006	3.06694	1.68155e-20	**
S-A-HA	miR-20a-3p	19044002	7385833	18	65	0.9452	8.8006	3.21891	1.66213e-21	**
S-A-HA	miR-134	19044002	7385833	248	64	13.0225	8.6652	-0.587701	0.00294204
S-A-HA	miR-135-2*	19044002	7385833	174	63	9.1367	8.5298	-0.0991613	0.670178
S-A-HA	miR-4443	19044002	7385833	88	63	4.6209	8.5298	0.884338	0.000248998
S-A-HA	miR-1940	19044002	7385833	48	63	2.5205	8.5298	1.7588	1.88243e-10	**
S-A-HA	miR-4286	19044002	7385833	20	63	1.0502	8.5298	3.02185	1.26869e-19	**
S-A-HA	miR-20a-2*	19044002	7385833	17	63	0.8927	8.5298	3.25626	3.97756e-21	**
S-A-HA	miR-135a*	19044002	7385833	152	62	7.9815	8.3944	0.0727673	0.706133
S-A-HA	miR-2974	19044002	7385833	7	62	0.3676	8.3944	4.51322	3.30616e-27	**
S-A-HA	miR-4599a	19044002	7385833	405	61	21.2665	8.2591	-1.36453	1.94313e-14	**
S-A-HA	miR-95	19044002	7385833	184	61	9.6618	8.2591	-0.226307	0.302914
S-A-HA	miR-135a-2-3p	19044002	7385833	174	61	9.1367	8.2591	-0.145689	0.52269
S-A-HA	miR-411*	19044002	7385833	95	61	4.9884	8.2591	0.727407	0.00234729
S-A-HA	miR-4770	19044002	7385833	76	60	3.9908	8.1237	1.02546	4.99221e-05	**
S-A-HA	miR-411a-3p	19044002	7385833	93	59	4.8834	7.9883	0.710003	0.00338688
S-A-HA	miR-3959-3p	19044002	7385833	76	59	3.9908	7.9883	1.00121	8.06271e-05	**
S-A-HA	miR-25-5p	19044002	7385833	49	58	2.573	7.8529	1.60977	1.03928e-08	**
S-A-HA	miR-4301	19044002	7385833	0	58	0.01	7.8529	9.61708	4.29563e-33	**
S-A-HA	miR-27a-5p	19044002	7385833	467	57	24.5222	7.7175	-1.66788	2.2888e-21	**
S-A-HA	miR-1908	19044002	7385833	0	57	0.01	7.7175	9.59199	1.53717e-32	**
S-A-HA	miR-376e-5p	19044002	7385833	17	56	0.8927	7.5821	3.08635	5.41159e-18	**
S-A-HA	let-7a-3p	19044002	7385833	174	55	9.1367	7.4467	-0.295072	0.194558
S-A-HA	miR-450b-5p	19044002	7385833	117	55	6.1437	7.4467	0.277493	0.227366
S-A-HA	miR-21-3p	19044002	7385833	95	55	4.9884	7.4467	0.578024	0.0183316
S-A-HA	miR-4336	19044002	7385833	110	54	5.7761	7.3113	0.340032	0.148989
S-A-HA	let-7b-3p	19044002	7385833	98	54	5.146	7.3113	0.506676	0.0378329
S-A-HA	miR-107b	19044002	7385833	87	54	4.5684	7.3113	0.678439	0.00700573
S-A-HA	miR-4317	19044002	7385833	0	54	0.01	7.3113	9.51398	7.0438e-31	**
S-A-HA	miR-342-5p	19044002	7385833	287	53	15.0704	7.1759	-1.07049	9.67409e-08	**
S-A-HA	miR-101a-5p	19044002	7385833	92	53	4.8309	7.1759	0.570868	0.0219378
S-A-HA	miR-379-3p	19044002	7385833	29	53	1.5228	7.1759	2.23643	4.54915e-12	**
S-A-HA	miR-33a-3p	19044002	7385833	8	53	0.4201	7.1759	4.09436	6.55953e-22	**
S-A-HA	miR-544-5p	19044002	7385833	2	53	0.105	7.1759	6.0947	2.04397e-27	**
S-A-HA	miR-2449	19044002	7385833	0	53	0.01	7.1759	9.48702	2.52059e-30	**
S-A-HA	let-7f-1*	19044002	7385833	163	52	8.5591	7.0405	-0.281781	0.231187
S-A-HA	miR-769	19044002	7385833	156	52	8.1916	7.0405	-0.218467	0.363679
S-A-HA	miR-450a-5p	19044002	7385833	135	52	7.0888	7.0405	-0.00986354	0.995196
S-A-HA	miR-450b	19044002	7385833	131	52	6.8788	7.0405	0.033521	0.849903
S-A-HA	miR-450a	19044002	7385833	130	52	6.8263	7.0405	0.0445741	0.813786
S-A-HA	let-7b*	19044002	7385833	93	52	4.8834	7.0405	0.527792	0.0343483
S-A-HA	miR-101-5p	19044002	7385833	93	52	4.8834	7.0405	0.527792	0.0343483
S-A-HA	miR-491-5p	19044002	7385833	27	52	1.4178	7.0405	2.31202	2.46173e-12	**
S-A-HA	miR-379*	19044002	7385833	33	51	1.7328	6.9051	1.99456	3.42198e-10	**
S-A-HA	miR-376c*	19044002	7385833	20	51	1.0502	6.9051	2.717	1.67601e-14	**
S-A-HA	miR-2284g	19044002	7385833	1	51	0.0525	6.9051	7.0392	1.24165e-27	**
S-A-HA	miR-30d*	19044002	7385833	143	50	7.5089	6.7697	-0.14951	0.557665
S-A-HA	miR-665-3p	19044002	7385833	30	50	1.5753	6.7697	2.10347	1.12106e-10	**
S-A-HA	miR-455	19044002	7385833	160	49	8.4016	6.6343	-0.34072	0.154142
S-A-HA	let-7k	19044002	7385833	88	49	4.6209	6.6343	0.52177	0.0417945
S-A-HA	miR-190a*	19044002	7385833	12	49	0.6301	6.6343	3.39629	1.92246e-17	**
S-A-HA	miR-376c-5p	19044002	7385833	10	49	0.5251	6.6343	3.65928	1.27136e-18	**
S-A-HA	miR-326-3p	19044002	7385833	85	48	4.4633	6.4989	0.542085	0.0369836
S-A-HA	miR-3195	19044002	7385833	137	46	7.1939	6.2281	-0.207982	0.42149
S-A-HA	miR-411-3p	19044002	7385833	86	46	4.5159	6.2281	0.463779	0.0757236
S-A-HA	miR-4020a-5p	19044002	7385833	40	46	2.1004	6.2281	1.56813	5.60853e-07	**
S-A-HA	miR-4726-5p	19044002	7385833	1	46	0.0525	6.2281	6.89033	6.60338e-25	**
S-A-HA	miR-760-3p	19044002	7385833	182	45	9.5568	6.0927	-0.649446	0.00561551
S-A-HA	miR-30d-3p	19044002	7385833	131	45	6.8788	6.0927	-0.175075	0.511384
S-A-HA	miR-1357	19044002	7385833	27	45	1.4178	6.0927	2.10343	9.29565e-10	**
S-A-HA	miR-3168	19044002	7385833	0	45	0.01	6.0927	9.25094	6.77737e-26	**
S-A-HA	miR-2885	19044002	7385833	115	44	6.0386	5.9574	-0.0195313	0.980565
S-A-HA	miR-195-3p	19044002	7385833	72	44	3.7807	5.9574	0.656029	0.0177253
S-A-HA	miR-2127	19044002	7385833	51	44	2.678	5.9574	1.15353	0.000122695	**
S-A-HA	miR-1281	19044002	7385833	0	44	0.01	5.9574	9.21854	2.42525e-25	**
S-A-HA	miR-3123	19044002	7385833	0	44	0.01	5.9574	9.21854	2.42525e-25	**
S-A-HA	miR-3162-3p	19044002	7385833	46	43	2.4155	5.822	1.26919	4.07226e-05	**
S-A-HA	miR-1296	19044002	7385833	40	43	2.1004	5.822	1.47085	4.05187e-06	**
S-A-HA	miR-193b	19044002	7385833	27	43	1.4178	5.822	2.03786	4.74569e-09	**
S-A-HA	miR-1576	19044002	7385833	0	43	0.01	5.822	9.18537	8.67863e-25	**
S-A-HA	miR-122-5p	19044002	7385833	14	42	0.7351	5.6866	2.95155	2.76733e-13	**
S-A-HA	miR-989	19044002	7385833	9	42	0.4726	5.6866	3.58887	6.49148e-16	**
S-A-HA	miR-134-5p	19044002	7385833	189	41	9.9244	5.5512	-0.83818	0.000428719
S-A-HA	miR-195*	19044002	7385833	89	41	4.6734	5.5512	0.248327	0.340066
S-A-HA	miR-545-5p	19044002	7385833	20	41	1.0502	5.5512	2.40214	1.77077e-10	**
S-A-HA	miR-4210-5p	19044002	7385833	0	41	0.01	5.5512	9.11666	1.11133e-23	**
S-A-HA	miR-410-3p	19044002	7385833	90	40	4.7259	5.4158	0.196585	0.44499
S-A-HA	miR-324-3p	19044002	7385833	87	39	4.5684	5.2804	0.208958	0.424713
S-A-HA	miR-3575	19044002	7385833	47	39	2.468	5.2804	1.0973	0.00051006	**
S-A-HA	miR-87a-3p	19044002	7385833	0	39	0.01	5.2804	9.0445	1.42309e-22	**
S-A-HA	miR-3897-3p	19044002	7385833	126	38	6.6163	5.145	-0.362854	0.183216
S-A-HA	miR-2284c	19044002	7385833	112	38	5.8811	5.145	-0.192915	0.507403
S-A-HA	miR-335-3p	19044002	7385833	73	38	3.8332	5.145	0.424622	0.133819
S-A-HA	miR-495	19044002	7385833	24	38	1.2602	5.145	2.02952	3.9664e-08	**
S-A-HA	miR-4532	19044002	7385833	171	37	8.9792	5.0096	-0.841892	0.000788896
S-A-HA	miR-96	19044002	7385833	154	37	8.0865	5.0096	-0.69082	0.0073463
S-A-HA	miR-24*	19044002	7385833	120	37	6.3012	5.0096	-0.330931	0.235851
S-A-HA	miR-1763	19044002	7385833	37	37	1.9429	5.0096	1.36648	5.29697e-05	**
S-A-HA	miR-3613-3p	19044002	7385833	8	37	0.4201	5.0096	3.57589	3.74973e-14	**
S-A-HA	miR-709	19044002	7385833	6	37	0.3151	5.0096	3.99081	1.91315e-15	**
S-A-HA	miR-564	19044002	7385833	4	37	0.21	5.0096	4.57623	5.72342e-17	**
S-A-HA	miR-551b-3p	19044002	7385833	0	37	0.01	5.0096	8.96855	1.82231e-21	**
S-A-HA	miR-16-1-3p	19044002	7385833	57	36	2.9931	4.8742	0.703525	0.022
S-A-HA	miR-122	19044002	7385833	8	36	0.4201	4.8742	3.53636	1.11092e-13	**
S-A-HA	miR-551b	19044002	7385833	3	36	0.1575	4.8742	4.95174	2.48554e-17	**
S-A-HA	miR-4646-5p	19044002	7385833	0	36	0.01	4.8742	8.92902	6.52103e-21	**
S-A-HA	miR-27d	19044002	7385833	91	35	4.7784	4.7388	-0.0120059	0.986809
S-A-HA	miR-27b-5p	19044002	7385833	281	34	14.7553	4.6034	-1.68046	1.63776e-13	**
S-A-HA	let-7a-1-3p	19044002	7385833	111	34	5.8286	4.6034	-0.34045	0.24305
S-A-HA	miR-497*	19044002	7385833	72	34	3.7807	4.6034	0.284046	0.321487
S-A-HA	miR-1607	19044002	7385833	0	34	0.01	4.6034	8.84656	8.35038e-20	**
S-A-HA	miR-27b*	19044002	7385833	261	33	13.7051	4.468	-1.61701	4.58616e-12	**
S-A-HA	miR-1388*	19044002	7385833	191	33	10.0294	4.468	-1.16653	3.59484e-06	**
S-A-HA	miR-96-5p	19044002	7385833	145	33	7.6139	4.468	-0.769006	0.00434837
S-A-HA	miR-1268b	19044002	7385833	35	33	1.8378	4.468	1.28165	0.000280028	**
S-A-HA	miR-545*	19044002	7385833	27	33	1.4178	4.468	1.65598	9.56043e-06	**
S-A-HA	miR-1380	19044002	7385833	0	33	0.01	4.468	8.80349	2.98814e-19	**
S-A-HA	miR-3068-3p	19044002	7385833	0	33	0.01	4.468	8.80349	2.98814e-19	**
S-A-HA	miR-215	19044002	7385833	242	32	12.7074	4.3326	-1.55236	9.86244e-11	**
S-A-HA	miR-2993	19044002	7385833	234	32	12.2873	4.3326	-1.50386	5.05955e-10	**
S-A-HA	miR-411b-5p	19044002	7385833	36	32	1.8904	4.3326	1.19654	0.000705703	**
S-A-HA	miR-1669	19044002	7385833	0	32	0.01	4.3326	8.75909	1.06929e-18	**
S-A-HA	miR-9-1*	19044002	7385833	0	32	0.01	4.3326	8.75909	1.06929e-18	**
S-A-HA	miR-1388-5p	19044002	7385833	188	31	9.8719	4.1972	-1.2339	1.58778e-06	**
S-A-HA	miR-329	19044002	7385833	62	31	3.2556	4.1972	0.366504	0.231598
S-A-HA	miR-504	19044002	7385833	46	31	2.4155	4.1972	0.797105	0.0174978
S-A-HA	miR-93b	19044002	7385833	146	30	7.6665	4.0618	-0.916449	0.000899433
S-A-HA	miR-200c-5p	19044002	7385833	36	30	1.8904	4.0618	1.10343	0.0021146	**
S-A-HA	miR-200c*	19044002	7385833	35	30	1.8378	4.0618	1.14414	0.00154698	**
S-A-HA	miR-9-3p	19044002	7385833	4	30	0.21	4.0618	4.27366	2.02966e-13	**
S-A-HA	miR-9*	19044002	7385833	0	30	0.01	4.0618	8.66598	1.36926e-17	**
S-A-HA	miR-1268a	19044002	7385833	182	29	9.5568	3.9264	-1.28332	1.15077e-06	**
S-A-HA	miR-4499	19044002	7385833	172	29	9.0317	3.9264	-1.20179	7.02001e-06	**
S-A-HA	miR-16c	19044002	7385833	53	29	2.783	3.9264	0.496566	0.128089
S-A-HA	miR-425-3p	19044002	7385833	68	28	3.5707	3.791	0.0863715	0.74138
S-A-HA	miR-2284j	19044002	7385833	47	28	2.468	3.791	0.619236	0.0689335
S-A-HA	miR-16-2-3p	19044002	7385833	15	28	0.7876	3.791	2.26704	3.64536e-07	**
S-A-HA	miR-16*	19044002	7385833	7	28	0.3676	3.791	3.36637	1.62024e-10	**
S-A-HA	miR-9a*	19044002	7385833	4	28	0.21	3.791	4.17412	2.0379e-12	**
S-A-HA	miR-3281	19044002	7385833	191	27	10.0294	3.6556	-1.45606	4.37205e-08	**
S-A-HA	miR-125-2*	19044002	7385833	64	27	3.3606	3.6556	0.121389	0.667301
S-A-HA	miR-224-3p	19044002	7385833	8	27	0.4201	3.6556	3.1213	1.54163e-09	**
S-A-HA	miR-601	19044002	7385833	0	27	0.01	3.6556	8.51396	6.27438e-16	**
S-A-HA	miR-2435	19044002	7385833	1375	26	72.2012	3.5203	-4.35825	1.51521e-155	**
S-A-HA	miR-138	19044002	7385833	151	26	7.929	3.5203	-1.17144	3.81373e-05	**
S-A-HA	miR-2881	19044002	7385833	139	26	7.2989	3.5203	-1.05198	0.000291053	**
S-A-HA	miR-2355	19044002	7385833	101	26	5.3035	3.5203	-0.591246	0.0620215
S-A-HA	miR-1599	19044002	7385833	32	26	1.6803	3.5203	1.06698	0.00526169	**
S-A-HA	let-7f-2-3p	19044002	7385833	25	26	1.3127	3.5203	1.42316	0.000445362	**
S-A-HA	miR-450a*	19044002	7385833	15	26	0.7876	3.5203	2.16016	2.03625e-06	**
S-A-HA	miR-218a-1*	19044002	7385833	2	26	0.105	3.5203	5.06724	4.86568e-13	**
S-A-HA	miR-3178	19044002	7385833	0	26	0.01	3.5203	8.45955	2.24526e-15	**
S-A-HA	miR-4187-5p	19044002	7385833	0	26	0.01	3.5203	8.45955	2.24526e-15	**
S-A-HA	miR-409-5p	19044002	7385833	61	25	3.2031	3.3849	0.0796444	0.764384
S-A-HA	miR-2284b	19044002	7385833	49	25	2.573	3.3849	0.395662	0.244815
S-A-HA	miR-1842	19044002	7385833	46	25	2.4155	3.3849	0.486791	0.162437
S-A-HA	miR-5450	19044002	7385833	0	25	0.01	3.3849	8.40297	8.03454e-15	**
S-A-HA	miR-2284m	19044002	7385833	63	24	3.3081	3.2495	-0.0257851	0.996667
S-A-HA	miR-132-3p	19044002	7385833	50	24	2.6255	3.2495	0.307626	0.360356
S-A-HA	miR-331*	19044002	7385833	39	24	2.0479	3.2495	0.666072	0.0713224
S-A-HA	miR-4186-5p	19044002	7385833	10	24	0.5251	3.2495	2.62955	2.33131e-07	**
S-A-HA	miR-18	19044002	7385833	7	24	0.3676	3.2495	3.14401	1.0872e-08	**
S-A-HA	miR-18b	19044002	7385833	0	24	0.01	3.2495	8.34407	2.87512e-14	**
S-A-HA	miR-138-5p	19044002	7385833	141	23	7.4039	3.1141	-1.24947	2.94085e-05	**
S-A-HA	miR-369-5p	19044002	7385833	30	23	1.5753	3.1141	0.983189	0.0138954
S-A-HA	miR-200	19044002	7385833	26	23	1.3653	3.1141	1.1896	0.00405703	**
S-A-HA	miR-10b*	19044002	7385833	24	23	1.2602	3.1141	1.30516	0.00198093	**
S-A-HA	miR-92b*	19044002	7385833	23	23	1.2077	3.1141	1.36655	0.0013445	**
S-A-HA	miR-545	19044002	7385833	6	23	0.3151	3.1141	3.30493	9.4085e-09	**
S-A-HA	miR-316	19044002	7385833	0	23	0.01	3.1141	8.28267	1.02885e-13	**
S-A-HA	miR-5604	19044002	7385833	0	23	0.01	3.1141	8.28267	1.02885e-13	**
S-A-HA	miR-374b-3p	19044002	7385833	153	22	8.034	2.9787	-1.43144	1.4023e-06	**
S-A-HA	miR-338*	19044002	7385833	140	22	7.3514	2.9787	-1.30334	1.72102e-05	**
S-A-HA	miR-2015*	19044002	7385833	59	22	3.0981	2.9787	-0.0567009	0.933095
S-A-HA	miR-1777b	19044002	7385833	55	22	2.888	2.9787	0.0446121	0.845232
S-A-HA	miR-1814c	19044002	7385833	40	22	2.1004	2.9787	0.504019	0.174066
S-A-HA	miR-1185-5p	19044002	7385833	33	22	1.7328	2.9787	0.781578	0.0469937
S-A-HA	miR-24-1*	19044002	7385833	21	22	1.1027	2.9787	1.43364	0.00112804	**
S-A-HA	miR-188-5p	19044002	7385833	18	22	0.9452	2.9787	1.65599	0.000283686	**
S-A-HA	miR-219-5p	19044002	7385833	2	22	0.105	2.9787	4.82622	5.9227e-11	**
S-A-HA	miR-548ap-3p	19044002	7385833	0	22	0.01	2.9787	8.21854	3.68168e-13	**
S-A-HA	miR-181c-5p	19044002	7385833	135	21	7.0888	2.8433	-1.31798	2.10242e-05	**
S-A-HA	miR-138b	19044002	7385833	126	21	6.6163	2.8433	-1.21846	0.000110849	**
S-A-HA	miR-181d	19044002	7385833	108	21	5.6711	2.8433	-0.996062	0.00238343
S-A-HA	miR-330	19044002	7385833	103	21	5.4085	2.8433	-0.927662	0.00520923
S-A-HA	miR-181d-5p	19044002	7385833	101	21	5.3035	2.8433	-0.899378	0.0070537
S-A-HA	miR-664	19044002	7385833	85	21	4.4633	2.8433	-0.650544	0.0638003
S-A-HA	miR-29b-1-5p	19044002	7385833	74	21	3.8857	2.8433	-0.450608	0.222096
S-A-HA	miR-132	19044002	7385833	45	21	2.3629	2.8433	0.267008	0.444616
S-A-HA	miR-125b-1-3p	19044002	7385833	24	21	1.2602	2.8433	1.17391	0.00649556	**
S-A-HA	miR-374c-5p	19044002	7385833	4	21	0.21	2.8433	3.75911	5.68531e-09	**
S-A-HA	miR-544a	19044002	7385833	3	21	0.1575	2.8433	4.17414	1.19283e-09	**
S-A-HA	miR-4332	19044002	7385833	96	20	5.041	2.7079	-0.896535	0.00890351
S-A-HA	miR-146a-5p	19044002	7385833	75	20	3.9382	2.7079	-0.540362	0.144179
S-A-HA	miR-205-3p	19044002	7385833	58	20	3.0456	2.7079	-0.169552	0.704574
S-A-HA	miR-24-1-5p	19044002	7385833	20	20	1.0502	2.7079	1.36651	0.00272617	**
S-A-HA	miR-544-3p	19044002	7385833	3	20	0.1575	2.7079	4.10375	3.76501e-09	**
S-A-HA	miR-2284o	19044002	7385833	2	20	0.105	2.7079	4.68871	6.41477e-10	**
S-A-HA	miR-50*	19044002	7385833	221	19	11.6047	2.5725	-2.17347	1.3961e-14	**
S-A-HA	miR-1394	19044002	7385833	69	19	3.6232	2.5725	-0.494093	0.200055
S-A-HA	miR-2284v	19044002	7385833	22	19	1.1552	2.5725	1.15503	0.0104324	*
S-A-HA	miR-1375*	19044002	7385833	0	19	0.01	2.5725	8.00703	1.68706e-11	**
S-A-HA	miR-4003a-3p	19044002	7385833	0	19	0.01	2.5725	8.00703	1.68706e-11	**
S-A-HA	miR-190	19044002	7385833	1153	18	60.544	2.4371	-4.63475	2.97613e-135	**
S-A-HA	miR-323c	19044002	7385833	225	18	11.8147	2.4371	-2.27735	1.41848e-15	**
S-A-HA	miR-1227	19044002	7385833	40	18	2.1004	2.4371	0.214501	0.55017
S-A-HA	miR-542-5p	19044002	7385833	29	18	1.5228	2.4371	0.678439	0.108537
S-A-HA	miR-186-3p	19044002	7385833	25	18	1.3127	2.4371	0.892628	0.0431379
S-A-HA	miR-450b-3p	19044002	7385833	20	18	1.0502	2.4371	1.2145	0.00937812	**
S-A-HA	miR-2981	19044002	7385833	17	18	0.8927	2.4371	1.44892	0.00288385	**
S-A-HA	miR-543-3p	19044002	7385833	17	18	0.8927	2.4371	1.44892	0.00288385	**
S-A-HA	miR-137	19044002	7385833	12	18	0.6301	2.4371	1.95151	0.000215222	**
S-A-HA	miR-1249-3p	19044002	7385833	5	18	0.2625	2.4371	3.21478	5.50484e-07	**
S-A-HA	miR-4055-5p	19044002	7385833	3	18	0.1575	2.4371	3.95174	3.688e-08	**
S-A-HA	miR-219	19044002	7385833	2	18	0.105	2.4371	4.5367	6.84221e-09	**
S-A-HA	miR-5701	19044002	7385833	249	17	13.075	2.3017	-2.50604	7.24506e-19	**
S-A-HA	miR-193b-5p	19044002	7385833	52	17	2.7305	2.3017	-0.246465	0.592841
S-A-HA	miR-125	19044002	7385833	21	17	1.1027	2.3017	1.06166	0.0231934	*
S-A-HA	miR-146b*	19044002	7385833	17	17	0.8927	2.3017	1.36645	0.005571	**
S-A-HA	miR-2284p	19044002	7385833	14	17	0.7351	2.3017	1.64669	0.00142666	**
S-A-HA	miR-137-3p	19044002	7385833	12	17	0.6301	2.3017	1.86905	0.000478935	**
S-A-HA	miR-347	19044002	7385833	12	17	0.6301	2.3017	1.86905	0.000478935	**
S-A-HA	miR-466f-3p	19044002	7385833	0	17	0.01	2.3017	7.84656	2.16033e-10	**
S-A-HA	miR-4057-5p	19044002	7385833	34601	16	1816.9	2.1663	-9.71203	0	**
S-A-HA	miR-4791	19044002	7385833	2433	16	127.757	2.1663	-5.88202	7.72062565740002e-315	**
S-A-HA	miR-466i-5p	19044002	7385833	853	16	44.791	2.1663	-4.3699	3.62745e-97	**
S-A-HA	miR-1346	19044002	7385833	130	16	6.8263	2.1663	-1.65587	8.74389e-07	**
S-A-HA	miR-186*	19044002	7385833	41	16	2.1529	2.1663	0.00895174	0.914947
S-A-HA	miR-425*	19044002	7385833	37	16	1.9429	2.1663	0.157021	0.656122
S-A-HA	miR-188	19044002	7385833	16	16	0.8402	2.1663	1.36643	0.00708467	**
S-A-HA	miR-1306	19044002	7385833	15	16	0.7876	2.1663	1.4597	0.00463127	**
S-A-HA	miR-1408	19044002	7385833	15	16	0.7876	2.1663	1.4597	0.00463127	**
S-A-HA	miR-211-5p	19044002	7385833	7	16	0.3676	2.1663	2.55902	3.16016e-05	**
S-A-HA	miR-411b-3p	19044002	7385833	6	16	0.3151	2.1663	2.78135	1.24896e-05	**
S-A-HA	miR-4324	19044002	7385833	1	16	0.0525	2.1663	5.36677	1.02426e-08	**
S-A-HA	miR-135c	19044002	7385833	0	16	0.01	2.1663	7.75909	7.73064e-10	**
S-A-HA	miR-4166-5p	19044002	7385833	101	15	5.3035	2.0309	-1.38483	0.000148199	**
S-A-HA	miR-125a-3p	19044002	7385833	57	15	2.9931	2.0309	-0.559521	0.196093
S-A-HA	miR-126b	19044002	7385833	43	15	2.2579	2.0309	-0.152862	0.790054
S-A-HA	miR-671-3p	19044002	7385833	36	15	1.8904	2.0309	0.103428	0.749212
S-A-HA	miR-3660	19044002	7385833	30	15	1.5753	2.0309	0.366493	0.381426
S-A-HA	let-7f-1-3p	19044002	7385833	27	15	1.4178	2.0309	0.518465	0.239457
S-A-HA	miR-424-3p	19044002	7385833	27	15	1.4178	2.0309	0.518465	0.239457
S-A-HA	miR-666	19044002	7385833	15	15	0.7876	2.0309	1.36658	0.00902096	**
S-A-HA	miR-8-3p	19044002	7385833	13	15	0.6826	2.0309	1.57301	0.00369473	**
S-A-HA	miR-26b-3p	19044002	7385833	11	15	0.5776	2.0309	1.81398	0.00129095	**
S-A-HA	let-7e-3p	19044002	7385833	10	15	0.5251	2.0309	1.95146	0.000709956	**
S-A-HA	miR-3584-5p	19044002	7385833	7	15	0.3676	2.0309	2.46591	8.08809e-05	**
S-A-HA	miR-2366	19044002	7385833	5	15	0.2625	2.0309	2.95173	1.22954e-05	**
S-A-HA	miR-31-3p	19044002	7385833	3	15	0.1575	2.0309	3.6887	1.07448e-06	**
S-A-HA	miR-3187-5p	19044002	7385833	2	15	0.105	2.0309	4.27366	2.29993e-07	**
S-A-HA	miR-1421z*	19044002	7385833	0	15	0.01	2.0309	7.66598	2.76637e-09	**
S-A-HA	miR-54-5p	19044002	7385833	0	15	0.01	2.0309	7.66598	2.76637e-09	**
S-A-HA	miR-4006d-5p	19044002	7385833	733	14	38.4898	1.8955	-4.34383	2.17446e-83	**
S-A-HA	miR-99b-3p	19044002	7385833	69	14	3.6232	1.8955	-0.934686	0.0232633
S-A-HA	miR-874-3p	19044002	7385833	28	14	1.4703	1.8955	0.366468	0.394587
S-A-HA	miR-1839-3p	19044002	7385833	20	14	1.0502	1.8955	0.851914	0.0831312
S-A-HA	miR-1306-5p	19044002	7385833	13	14	0.6826	1.8955	1.47347	0.00746402	**
S-A-HA	miR-211	19044002	7385833	8	14	0.4201	1.8955	2.17377	0.000433568	**
S-A-HA	miR-4459	19044002	7385833	8	14	0.4201	1.8955	2.17377	0.000433568	**
S-A-HA	miR-2225	19044002	7385833	0	14	0.01	1.8955	7.56643	9.89932e-09	**
S-A-HA	miR-2308	19044002	7385833	0	14	0.01	1.8955	7.56643	9.89932e-09	**
S-A-HA	miR-690	19044002	7385833	0	14	0.01	1.8955	7.56643	9.89932e-09	**
S-A-HA	miR-2312	19044002	7385833	80	13	4.2008	1.7601	-1.25501	0.00184422	**
S-A-HA	miR-194-3p	19044002	7385833	56	13	2.9406	1.7601	-0.740453	0.0981891
S-A-HA	miR-10b-3p	19044002	7385833	31	13	1.6278	1.7601	0.112734	0.742201
S-A-HA	miR-2350	19044002	7385833	27	13	1.4178	1.7601	0.312003	0.469571
S-A-HA	miR-299b-3p	19044002	7385833	11	13	0.5776	1.7601	1.60751	0.0058818	**
S-A-HA	miR-74-3p	19044002	7385833	7	13	0.3676	1.7601	2.25945	0.000502861	**
S-A-HA	miR-265	19044002	7385833	0	13	0.01	1.7601	7.45951	3.54242e-08	**
S-A-HA	miR-3112-5p	19044002	7385833	0	13	0.01	1.7601	7.45951	3.54242e-08	**
S-A-HA	miR-505	19044002	7385833	0	13	0.01	1.7601	7.45951	3.54242e-08	**
S-A-HA	miR-181c	19044002	7385833	99	12	5.1985	1.6247	-1.67792	1.65992e-05	**
S-A-HA	miR-2137	19044002	7385833	96	12	5.041	1.6247	-1.63354	3.1866e-05	**
S-A-HA	miR-421*	19044002	7385833	57	12	2.9931	1.6247	-0.881467	0.0518219
S-A-HA	miR-2284n	19044002	7385833	36	12	1.8904	1.6247	-0.218518	0.719755
S-A-HA	miR-454b	19044002	7385833	33	12	1.7328	1.6247	-0.0929318	0.926583
S-A-HA	miR-454-3p	19044002	7385833	29	12	1.5228	1.6247	0.0934469	0.775169
S-A-HA	let-7i-3p	19044002	7385833	15	12	0.7876	1.6247	1.04464	0.0566943
S-A-HA	miR-15b-3p	19044002	7385833	14	12	0.7351	1.6247	1.14416	0.0405471	*
S-A-HA	miR-4306	19044002	7385833	9	12	0.4726	1.6247	1.78148	0.004328	**
S-A-HA	miR-2374	19044002	7385833	4	12	0.21	1.6247	2.95171	9.10709e-05	**
S-A-HA	miR-2753	19044002	7385833	2	12	0.105	1.6247	3.95171	7.30332e-06	**
S-A-HA	miR-4434	19044002	7385833	2	12	0.105	1.6247	3.95171	7.30332e-06	**
S-A-HA	miR-5456	19044002	7385833	1	12	0.0525	1.6247	4.95171	1.31418e-06	**
S-A-HA	miR-4013b-5p	19044002	7385833	0	12	0.01	1.6247	7.34403	1.26764e-07	**
S-A-HA	miR-370	19044002	7385833	214	11	11.2371	1.4893	-2.91556	7.16124e-19	**
S-A-HA	miR-191-3p	19044002	7385833	65	11	3.4131	1.4893	-1.19645	0.00725909	**
S-A-HA	miR-382-3p	19044002	7385833	62	11	3.2556	1.4893	-1.12829	0.0124853	*
S-A-HA	miR-30c-1-3p	19044002	7385833	40	11	2.1004	1.4893	-0.49603	0.350186
S-A-HA	miR-326	19044002	7385833	37	11	1.9429	1.4893	-0.383577	0.493144
S-A-HA	miR-1749	19044002	7385833	32	11	1.6803	1.4893	-0.174084	0.807643
S-A-HA	miR-365-5p	19044002	7385833	32	11	1.6803	1.4893	-0.174084	0.807643
S-A-HA	miR-433-3p	19044002	7385833	16	11	0.8402	1.4893	0.82583	0.129555
S-A-HA	let-7i*	19044002	7385833	14	11	0.7351	1.4893	1.01862	0.0726482
S-A-HA	miR-1247-3p	19044002	7385833	12	11	0.6301	1.4893	1.24098	0.0361058	*
S-A-HA	miR-1386	19044002	7385833	4	11	0.21	1.4893	2.82617	0.000251425	**
S-A-HA	miR-2899	19044002	7385833	4	11	0.21	1.4893	2.82617	0.000251425	**
S-A-HA	miR-1796	19044002	7385833	3	11	0.1575	1.4893	3.24121	8.45168e-05	**
S-A-HA	miR-3610	19044002	7385833	3	11	0.1575	1.4893	3.24121	8.45168e-05	**
S-A-HA	miR-656	19044002	7385833	2	11	0.105	1.4893	3.82617	2.2746e-05	**
S-A-HA	miR-4185-3p	19044002	7385833	1	11	0.0525	1.4893	4.82617	4.37587e-06	**
S-A-HA	miR-765	19044002	7385833	1	11	0.0525	1.4893	4.82617	4.37587e-06	**
S-A-HA	miR-3751	19044002	7385833	0	11	0.01	1.4893	7.21849	4.53618e-07	**
S-A-HA	miR-2284l	19044002	7385833	2404	10	126.234	1.3539	-6.54284	5.14816402966579e-321	**
S-A-HA	miR-152b	19044002	7385833	425	10	22.3167	1.3539	-4.04293	8.82395e-47	**
S-A-HA	miR-490*	19044002	7385833	224	10	11.7622	1.3539	-3.11896	7.19319e-21	**
S-A-HA	miR-2305	19044002	7385833	106	10	5.5661	1.3539	-2.03955	3.9691e-07	**
S-A-HA	miR-3745	19044002	7385833	76	10	3.9908	1.3539	-1.55956	0.000372002	**
S-A-HA	miR-599	19044002	7385833	42	10	2.2054	1.3539	-0.703919	0.180072
S-A-HA	miR-365b-5p	19044002	7385833	41	10	2.1529	1.3539	-0.66916	0.207078
S-A-HA	miR-2484	19044002	7385833	36	10	1.8904	1.3539	-0.48157	0.395559
S-A-HA	miR-2441	19044002	7385833	30	10	1.5753	1.3539	-0.218505	0.757086
S-A-HA	miR-10a*	19044002	7385833	15	10	0.7876	1.3539	0.781586	0.164546
S-A-HA	miR-339-3p	19044002	7385833	12	10	0.6301	1.3539	1.10347	0.0670812
S-A-HA	miR-490-3p	19044002	7385833	12	10	0.6301	1.3539	1.10347	0.0670812
S-A-HA	miR-93-3p	19044002	7385833	5	10	0.2625	1.3539	2.36673	0.00162859	**
S-A-HA	miR-1369	19044002	7385833	3	10	0.1575	1.3539	3.1037	0.00024379	**
S-A-HA	miR-3154	19044002	7385833	3	10	0.1575	1.3539	3.1037	0.00024379	**
S-A-HA	miR-3885-5p	19044002	7385833	2	10	0.105	1.3539	3.68866	7.01125e-05	**
S-A-HA	miR-2861	19044002	7385833	1	10	0.0525	1.3539	4.68866	1.44892e-05	**
S-A-HA	miR-988*	19044002	7385833	1	10	0.0525	1.3539	4.68866	1.44892e-05	**
S-A-HA	miR-2126	19044002	7385833	0	10	0.01	1.3539	7.08098	1.62325e-06	**
S-A-HA	miR-4291	19044002	7385833	0	10	0.01	1.3539	7.08098	1.62325e-06	**
S-A-HA	miR-301b-3p	19044002	7385833	49	9	2.573	1.2185	-1.07835	0.0343223	*
S-A-HA	miR-1584	19044002	7385833	37	9	1.9429	1.2185	-0.673105	0.232702
S-A-HA	miR-2440	19044002	7385833	36	9	1.8904	1.2185	-0.633585	0.267353
S-A-HA	miR-4128-3p	19044002	7385833	35	9	1.8378	1.2185	-0.592874	0.306033
S-A-HA	miR-431-3p	19044002	7385833	34	9	1.7853	1.2185	-0.55106	0.348978
S-A-HA	miR-541-5p	19044002	7385833	33	9	1.7328	1.2185	-0.507999	0.396388
S-A-HA	miR-30b*	19044002	7385833	31	9	1.6278	1.2185	-0.417817	0.505143
S-A-HA	miR-503*	19044002	7385833	21	9	1.1027	1.2185	0.144066	0.718396
S-A-HA	miR-150*	19044002	7385833	14	9	0.7351	1.2185	0.729094	0.209144
S-A-HA	miR-758	19044002	7385833	14	9	0.7351	1.2185	0.729094	0.209144
S-A-HA	miR-320e	19044002	7385833	13	9	0.6826	1.2185	0.835994	0.160872
S-A-HA	miR-130b-5p	19044002	7385833	12	9	0.6301	1.2185	0.951454	0.120093
S-A-HA	miR-1299	19044002	7385833	11	9	0.5776	1.2185	1.07696	0.0866516
S-A-HA	miR-33b-5p	19044002	7385833	10	9	0.5251	1.2185	1.21444	0.0601307
S-A-HA	miR-34b-3p	19044002	7385833	7	9	0.3676	1.2185	1.7289	0.0148399	*
S-A-HA	miR-4429	19044002	7385833	7	9	0.3676	1.2185	1.7289	0.0148399	*
S-A-HA	miR-485-3p	19044002	7385833	5	9	0.2625	1.2185	2.21472	0.00406988	**
S-A-HA	miR-377-3p	19044002	7385833	2	9	0.105	1.2185	3.53665	0.000213534	**
S-A-HA	miR-1699	19044002	7385833	0	9	0.01	1.2185	6.92896	5.80872e-06	**
S-A-HA	miR-2900	19044002	7385833	0	9	0.01	1.2185	6.92896	5.80872e-06	**
S-A-HA	miR-4020b-5p	19044002	7385833	37	8	1.9429	1.0832	-0.842912	0.143358
S-A-HA	miR-323	19044002	7385833	20	8	1.0502	1.0832	0.0446355	0.846654
S-A-HA	miR-3957-5p	19044002	7385833	15	8	0.7876	1.0832	0.459765	0.408292
S-A-HA	miR-190a-5p	19044002	7385833	9	8	0.4726	1.0832	1.19661	0.0780138
S-A-HA	let-7g-3p	19044002	7385833	6	8	0.3151	1.0832	1.78142	0.0186299	*
S-A-HA	miR-327	19044002	7385833	6	8	0.3151	1.0832	1.78142	0.0186299	*
S-A-HA	miR-17-2-3p	19044002	7385833	2	8	0.105	1.0832	3.36684	0.000641225	**
S-A-HA	miR-2976	19044002	7385833	2	8	0.105	1.0832	3.36684	0.000641225	**
S-A-HA	miR-19b-1-5p	19044002	7385833	1	8	0.0525	1.0832	4.36684	0.000155584	**
S-A-HA	miR-106*	19044002	7385833	0	8	0.01	1.0832	6.75916	2.07862e-05	**
S-A-HA	miR-124-3p	19044002	7385833	0	8	0.01	1.0832	6.75916	2.07862e-05	**
S-A-HA	miR-2195	19044002	7385833	0	8	0.01	1.0832	6.75916	2.07862e-05	**
S-A-HA	miR-3147	19044002	7385833	0	8	0.01	1.0832	6.75916	2.07862e-05	**
S-A-HA	miR-5110	19044002	7385833	0	8	0.01	1.0832	6.75916	2.07862e-05	**
S-A-HA	miR-4006a-5p	19044002	7385833	4455	7	233.932	0.9478	-7.94729	0	**
S-A-HA	miR-383	19044002	7385833	1435	7	75.3518	0.9478	-6.31292	2.76641e-190	**
S-A-HA	miR-1384	19044002	7385833	114	7	5.9861	0.9478	-2.65896	8.99173e-10	**
S-A-HA	miR-376a-5p	19044002	7385833	41	7	2.1529	0.9478	-1.18363	0.0389743	*
S-A-HA	miR-217	19044002	7385833	39	7	2.0479	0.9478	-1.11149	0.0564434
S-A-HA	miR-214-5p	19044002	7385833	36	7	1.8904	0.9478	-0.996037	0.096238
S-A-HA	miR-376a*	19044002	7385833	35	7	1.8378	0.9478	-0.955325	0.114249
S-A-HA	miR-2483*	19044002	7385833	22	7	1.1552	0.9478	-0.285488	0.740156
S-A-HA	miR-101b	19044002	7385833	21	7	1.1027	0.9478	-0.218386	0.825942
S-A-HA	miR-1557	19044002	7385833	216	6	11.3422	0.8124	-3.80337	2.12074e-23	**
S-A-HA	miR-380-5p	19044002	7385833	37	6	1.9429	0.8124	-1.25795	0.0410103	*
S-A-HA	miR-365-2-5p	19044002	7385833	32	6	1.6803	0.8124	-1.04846	0.105001
S-A-HA	miR-2483	19044002	7385833	30	6	1.5753	0.8124	-0.955364	0.149425
S-A-HA	miR-4442	19044002	7385833	22	6	1.1552	0.8124	-0.50788	0.518962
S-A-HA	miR-30c*	19044002	7385833	9622	5	505.251	0.677	-9.54363	0	**
S-A-HA	miR-2963	19044002	7385833	379	5	19.9013	0.677	-4.87756	1.97892e-46	**
S-A-HA	miR-381-3p	19044002	7385833	377	5	19.7963	0.677	-4.86993	3.71373e-46	**
S-A-HA	miR-1291	19044002	7385833	51	5	2.678	0.677	-1.98393	0.000734315	**
S-A-HA	miR-5105	19044002	7385833	38	5	1.9954	0.677	-1.55945	0.0147784	*
S-A-HA	miR-3653	19044002	7385833	32	5	1.6803	0.677	-1.31149	0.052183
S-A-HA	miR-3197	19044002	7385833	31	5	1.6278	0.677	-1.2657	0.063757
S-A-HA	miR-181c-3p	19044002	7385833	27	5	1.4178	0.677	-1.06643	0.137379
S-A-HA	miR-3607-3p	19044002	7385833	27	5	1.4178	0.677	-1.06643	0.137379
S-A-HA	miR-191*	19044002	7385833	26	5	1.3653	0.677	-1.01199	0.164908
S-A-HA	miR-3545-3p	19044002	7385833	26	5	1.3653	0.677	-1.01199	0.164908
S-A-HA	miR-920	19044002	7385833	2135	4	112.109	0.5416	-7.69346	9.96276e-295	**
S-A-HA	miR-370-3p	19044002	7385833	193	4	10.1344	0.5416	-4.22589	1.94759e-22	**
S-A-HA	miR-2840	19044002	7385833	82	4	4.3058	0.5416	-2.99098	4.72833e-08	**
S-A-HA	miR-1417*	19044002	7385833	59	4	3.0981	0.5416	-2.51608	2.66301e-05	**
S-A-HA	miR-92a-2*	19044002	7385833	29	4	1.5228	0.5416	-1.49143	0.0433285	*
S-A-HA	miR-27c-3p	19044002	7385833	27	4	1.4178	0.5416	-1.38835	0.0663968
S-A-HA	miR-4042-3p	19044002	7385833	25	4	1.3127	0.5416	-1.27724	0.100395
S-A-HA	miR-2392	19044002	7385833	24	4	1.2602	0.5416	-1.21835	0.122773
S-A-HA	miR-28c	19044002	7385833	6535	3	343.153	0.4062	-9.72244	0	**
S-A-HA	let-7h	19044002	7385833	2075	3	108.958	0.4062	-8.06737	2.11996e-288	**
S-A-HA	miR-1434	19044002	7385833	465	3	24.4171	0.4062	-5.90956	3.55679e-61	**
S-A-HA	miR-575	19044002	7385833	227	3	11.9198	0.4062	-4.87503	3.22892e-28	**
S-A-HA	miR-181a-2-3p	19044002	7385833	203	3	10.6595	0.4062	-4.71381	6.07127e-25	**
S-A-HA	miR-1343*	19044002	7385833	154	3	8.0865	0.4062	-4.31525	2.56485e-18	**
S-A-HA	miR-149-5p	19044002	7385833	109	3	5.7236	0.4062	-3.81666	2.41554e-12	**
S-A-HA	miR-285	19044002	7385833	60	3	3.1506	0.4062	-2.95536	4.28884e-06	**
S-A-HA	miR-2888	19044002	7385833	50	3	2.6255	0.4062	-2.69233	6.93813e-05	**
S-A-HA	miR-1321	19044002	7385833	36	3	1.8904	0.4062	-2.21843	0.00287705	**
S-A-HA	miR-263a	19044002	7385833	26	3	1.3653	0.4062	-1.74896	0.0338156	*
S-A-HA	miR-412-3p	19044002	7385833	24	3	1.2602	0.4062	-1.63339	0.0537384
S-A-HA	miR-3125	19044002	7385833	20	3	1.0502	0.4062	-1.3704	0.130355
S-A-HA	miR-10d	19044002	7385833	93359	2	4902.28	0.2708	-14.1439	0	**
S-A-HA	miR-4478	19044002	7385833	381	2	20.0063	0.2708	-6.20708	4.93794e-51	**
S-A-HA	miR-1816	19044002	7385833	138	2	7.2464	0.2708	-4.74196	2.6255e-17	**
S-A-HA	miR-24-2-5p	19044002	7385833	122	2	6.4062	0.2708	-4.56417	3.92318e-15	**
S-A-HA	miR-21*	19044002	7385833	79	2	4.1483	0.2708	-3.93722	2.26794e-09	**
S-A-HA	miR-3654	19044002	7385833	32	2	1.6803	0.2708	-2.63342	0.00217062	**
S-A-HA	miR-100b	19044002	7385833	17474	1	917.559	0.1354	-12.7264	0	**
S-A-HA	miR-509-3-5p	19044002	7385833	3517	1	184.678	0.1354	-10.4136	0	**
S-A-HA	miR-4806-3p	19044002	7385833	402	1	21.109	0.1354	-7.28449	9.88501e-56	**
S-A-HA	miR-2412	19044002	7385833	27	1	1.4178	0.1354	-3.38835	0.0018252	**
S-A-HA	miR-263b	19044002	7385833	23	1	1.2077	0.1354	-3.15696	0.00591337	**
S-A-HA	miR-881	19044002	7385833	29370	0	1542.22	0.01	-17.2346	0	**
S-A-HA	miR-3175	19044002	7385833	27377	0	1437.57	0.01	-17.1333	0	**
S-A-HA	miR-3966	19044002	7385833	25136	0	1319.89	0.01	-17.0101	0	**
S-A-HA	miR-29-3p	19044002	7385833	21450	0	1126.34	0.01	-16.7813	0	**
S-A-HA	miR-125*	19044002	7385833	20053	0	1052.98	0.01	-16.6841	0	**
S-A-HA	miR-125a*	19044002	7385833	15723	0	825.614	0.01	-16.3332	0	**
S-A-HA	miR-3138	19044002	7385833	10637	0	558.549	0.01	-15.7694	0	**
S-A-HA	miR-4262	19044002	7385833	7826	0	410.943	0.01	-15.3266	0	**
S-A-HA	miR-5045	19044002	7385833	6846	0	359.483	0.01	-15.1336	0	**
S-A-HA	miR-5612*	19044002	7385833	5357	0	281.296	0.01	-14.7798	0	**
S-A-HA	miR-3182	19044002	7385833	5306	0	278.618	0.01	-14.766	0	**
S-A-HA	miR-2691*	19044002	7385833	4363	0	229.101	0.01	-14.4837	0	**
S-A-HA	miR-1670	19044002	7385833	4011	0	210.618	0.01	-14.3623	0	**
S-A-HA	miR-694	19044002	7385833	3829	0	201.061	0.01	-14.2953	0	**
S-A-HA	miR-5585-5p	19044002	7385833	2328	0	122.243	0.01	-13.5775	0	**
S-A-HA	miR-9d-3p	19044002	7385833	2037	0	106.963	0.01	-13.3848	1.65877e-290	**
S-A-HA	miR-650c	19044002	7385833	1746	0	91.6824	0.01	-13.1624	4.36144e-249	**
S-A-HA	miR-2230*	19044002	7385833	1543	0	81.0229	0.01	-12.9841	3.41889e-220	**
S-A-HA	miR-3874-5p	19044002	7385833	1077	0	56.5532	0.01	-12.4654	7.28736e-154	**
S-A-HA	miR-3422	19044002	7385833	824	0	43.2682	0.01	-12.0791	7.47545e-118	**
S-A-HA	miR-2307	19044002	7385833	789	0	41.4304	0.01	-12.0165	7.16812e-113	**
S-A-HA	miR-99b	19044002	7385833	708	0	37.1771	0.01	-11.8602	2.4246e-101	**
S-A-HA	miR-932	19044002	7385833	653	0	34.289	0.01	-11.7435	1.63355e-93	**
S-A-HA	miR-3808-5p	19044002	7385833	607	0	31.8736	0.01	-11.6381	5.76236e-87	**
S-A-HA	miR-716a	19044002	7385833	605	0	31.7685	0.01	-11.6334	1.10987e-86	**
S-A-HA	miR-5408c-3p	19044002	7385833	418	0	21.9492	0.01	-11.1	4.59355e-60	**
S-A-HA	miR-1721	19044002	7385833	387	0	20.3214	0.01	-10.9888	1.18733e-55	**
S-A-HA	miR-181a-2*	19044002	7385833	385	0	20.2163	0.01	-10.9813	2.28688e-55	**
S-A-HA	miR-501*	19044002	7385833	363	0	19.0611	0.01	-10.8964	3.09486e-52	**
S-A-HA	miR-199-3p	19044002	7385833	311	0	16.3306	0.01	-10.6734	7.80055e-45	**
S-A-HA	miR-989-3p	19044002	7385833	300	0	15.753	0.01	-10.6214	2.86962e-43	**
S-A-HA	miR-4127-3p	19044002	7385833	270	0	14.1777	0.01	-10.4694	5.34454e-39	**
S-A-HA	miR-4008b-5p	19044002	7385833	244	0	12.8124	0.01	-10.3233	2.6832e-35	**
S-A-HA	miR-4677-3p	19044002	7385833	233	0	12.2348	0.01	-10.2568	9.87078e-34	**
S-A-HA	miR-380	19044002	7385833	222	0	11.6572	0.01	-10.187	3.6312e-32	**
S-A-HA	miR-4792	19044002	7385833	198	0	10.397	0.01	-10.022	9.46498e-29	**
S-A-HA	miR-3967	19044002	7385833	192	0	10.0819	0.01	-9.97755	6.76296e-28	**
S-A-HA	miR-5122	19044002	7385833	189	0	9.9244	0.01	-9.95484	1.80778e-27	**
S-A-HA	miR-5610	19044002	7385833	188	0	9.8719	0.01	-9.94718	2.50889e-27	**
S-A-HA	miR-1287	19044002	7385833	180	0	9.4518	0.01	-9.88445	3.4528e-26	**
S-A-HA	miR-4489	19044002	7385833	160	0	8.4016	0.01	-9.71452	2.42603e-23	**
S-A-HA	miR-1739	19044002	7385833	139	0	7.2989	0.01	-9.51154	2.36569e-20	**
S-A-HA	miR-4503	19044002	7385833	138	0	7.2464	0.01	-9.50112	3.28317e-20	**
S-A-HA	miR-548f	19044002	7385833	136	0	7.1414	0.01	-9.48006	6.32362e-20	**
S-A-HA	miR-3096-5p	19044002	7385833	126	0	6.6163	0.01	-9.36988	1.67621e-18	**
S-A-HA	miR-374a-3p	19044002	7385833	126	0	6.6163	0.01	-9.36988	1.67621e-18	**
S-A-HA	miR-2207-5p	19044002	7385833	124	0	6.5112	0.01	-9.34678	3.2285e-18	**
S-A-HA	miR-509-5p	19044002	7385833	115	0	6.0386	0.01	-9.23807	6.16633e-17	**
S-A-HA	miR-4177-3p	19044002	7385833	110	0	5.7761	0.01	-9.17395	3.17474e-16	**
S-A-HA	miR-1371	19044002	7385833	98	0	5.146	0.01	-9.00731	1.62085e-14	**
S-A-HA	miR-29a-1*	19044002	7385833	98	0	5.146	0.01	-9.00731	1.62085e-14	**
S-A-HA	miR-1967	19044002	7385833	94	0	4.9359	0.01	-8.94717	6.01295e-14	**
S-A-HA	miR-5111-5p	19044002	7385833	84	0	4.4108	0.01	-8.7849	1.59386e-12	**
S-A-HA	miR-1197-3p	19044002	7385833	81	0	4.2533	0.01	-8.73244	4.26048e-12	**
S-A-HA	miR-204	19044002	7385833	78	0	4.0958	0.01	-8.678	1.13885e-11	**
S-A-HA	miR-454*	19044002	7385833	73	0	3.8332	0.01	-8.58241	5.86339e-11	**
S-A-HA	miR-2851	19044002	7385833	72	0	3.7807	0.01	-8.56251	8.13739e-11	**
S-A-HA	miR-621	19044002	7385833	72	0	3.7807	0.01	-8.56251	8.13739e-11	**
S-A-HA	miR-4531	19044002	7385833	66	0	3.4657	0.01	-8.437	5.81437e-10	**
S-A-HA	miR-769-5p	19044002	7385833	66	0	3.4657	0.01	-8.437	5.81437e-10	**
S-A-HA	miR-239a*	19044002	7385833	63	0	3.3081	0.01	-8.36986	1.55421e-09	**
S-A-HA	miR-598	19044002	7385833	59	0	3.0981	0.01	-8.27524	5.76575e-09	**
S-A-HA	miR-967-5p	19044002	7385833	57	0	2.9931	0.01	-8.2255	1.11053e-08	**
S-A-HA	miR-101b-3p	19044002	7385833	56	0	2.9406	0.01	-8.19997	1.54122e-08	**
S-A-HA	miR-194*	19044002	7385833	56	0	2.9406	0.01	-8.19997	1.54122e-08	**
S-A-HA	miR-263	19044002	7385833	54	0	2.8355	0.01	-8.14746	2.9685e-08	**
S-A-HA	miR-4006c-5p	19044002	7385833	53	0	2.783	0.01	-8.1205	4.11977e-08	**
S-A-HA	miR-2477	19044002	7385833	51	0	2.678	0.01	-8.06501	7.93498e-08	**
S-A-HA	miR-762	19044002	7385833	51	0	2.678	0.01	-8.06501	7.93498e-08	**
S-A-HA	miR-2313	19044002	7385833	49	0	2.573	0.01	-8.00731	1.52833e-07	**
S-A-HA	miR-548at-3p	19044002	7385833	47	0	2.468	0.01	-7.9472	2.94368e-07	**
S-A-HA	miR-5107	19044002	7385833	46	0	2.4155	0.01	-7.91618	4.08533e-07	**
S-A-HA	miR-718	19044002	7385833	46	0	2.4155	0.01	-7.91618	4.08533e-07	**
S-A-HA	miR-4165-3p	19044002	7385833	44	0	2.3104	0.01	-7.852	7.86864e-07	**
S-A-HA	miR-1285-3p	19044002	7385833	41	0	2.1529	0.01	-7.75014	2.10333e-06	**
S-A-HA	miR-449d	19044002	7385833	40	0	2.1004	0.01	-7.71452	2.91907e-06	**
S-A-HA	miR-629-5p	19044002	7385833	40	0	2.1004	0.01	-7.71452	2.91907e-06	**
S-A-HA	miR-309a-5p	19044002	7385833	36	0	1.8904	0.01	-7.56255	1.0829e-05	**
S-A-HA	miR-5404	19044002	7385833	36	0	1.8904	0.01	-7.56255	1.0829e-05	**
S-A-HA	miR-2406	19044002	7385833	34	0	1.7853	0.01	-7.48002	2.08575e-05	**
S-A-HA	miR-663b	19044002	7385833	34	0	1.7853	0.01	-7.48002	2.08575e-05	**
S-A-HA	miR-4088-5p	19044002	7385833	33	0	1.7328	0.01	-7.43696	2.89466e-05	**
S-A-HA	miR-4458	19044002	7385833	32	0	1.6803	0.01	-7.39258	4.0173e-05	**
S-A-HA	miR-502b	19044002	7385833	31	0	1.6278	0.01	-7.34678	5.57533e-05	**
S-A-HA	miR-4718	19044002	7385833	28	0	1.4703	0.01	-7.19997	0.000149032	**
S-A-HA	miR-507	19044002	7385833	27	0	1.4178	0.01	-7.14751	0.000206831	**
S-A-HA	miR-3479-5p	19044002	7385833	26	0	1.3653	0.01	-7.09307	0.000287046	**
S-A-HA	miR-5394-3p	19044002	7385833	26	0	1.3653	0.01	-7.09307	0.000287046	**
S-A-HA	miR-676-5p	19044002	7385833	26	0	1.3653	0.01	-7.09307	0.000287046	**
S-A-HA	miR-1361	19044002	7385833	25	0	1.3127	0.01	-7.03639	0.000398371	**
S-A-HA	miR-5189	19044002	7385833	25	0	1.3127	0.01	-7.03639	0.000398371	**
S-A-HA	miR-84	19044002	7385833	25	0	1.3127	0.01	-7.03639	0.000398371	**
S-A-HA	miR-2021	19044002	7385833	24	0	1.2602	0.01	-6.97751	0.000552871	**
S-A-HA	miR-589-5p	19044002	7385833	24	0	1.2602	0.01	-6.97751	0.000552871	**
S-A-HA	miR-4018b-5p	19044002	7385833	23	0	1.2077	0.01	-6.91612	0.000767292	**
S-A-HA	miR-616-3p	19044002	7385833	23	0	1.2077	0.01	-6.91612	0.000767292	**
S-A-HA	miR-3970	19044002	7385833	22	0	1.1552	0.01	-6.852	0.00106487	**
S-A-HA	miR-5408a*	19044002	7385833	22	0	1.1552	0.01	-6.852	0.00106487	**
S-A-HA	miR-4048-3p	19044002	7385833	21	0	1.1027	0.01	-6.7849	0.00147786	**
S-A-HA	miR-4109-3p	19044002	7385833	21	0	1.1027	0.01	-6.7849	0.00147786	**
S-A-HA	miR-4194-3p	19044002	7385833	21	0	1.1027	0.01	-6.7849	0.00147786	**
S-A-HA	miR-3809-3p	19044002	7385833	20	0	1.0502	0.01	-6.71452	0.00205102	**
S-A-HA	miR-4183-5p	19044002	7385833	20	0	1.0502	0.01	-6.71452	0.00205102	**
S-A-HA	miR-941	19044002	7385833	20	0	1.0502	0.01	-6.71452	0.00205102	**
