# Supplementary material for: Identification of Novel and Differentially Expressed MicroRNAs of Dairy Goat Mammary Gland Tissues Using Solexa Sequencing and Bioinformatics
Source: PLoS One. 2012 Nov 14;7(11):e49463. doi: 10.1371/journal.pone.0049463 (PMC3498112; doi:10.1371/journal.pone.0049463)
Supplement: Table S2 — Characteristics of novel miRNA candidates. (XLS) [file pone.0049463.s006.xls]

## Sheet: Peak lactation
Id	location	mfe	Id(5p)	Id(3p)	count	count(5p)	count(3p)	seq	struct	seq(5p)	seq(3p)
S-A-m0001	gi|289623173|gb|CM000911.1|:37311992:37312069:+	-30.9	-	S-A-m0001-3p	10	-	10	ACTAGGTTGGCCCAAAAGTTCATTCGGGTTTTGTGACAGATTATGGAAAAACCTGAGCAAACTTTTTGGCCAGTATGG	.(((..((((((.(((((((..((((((((((....((.....))..))))))))))..))))))).))))))..)))	-	AAAAACCTGAGCAAACTTTTTG
S-A-m0002	gi|289623176|gb|CM000908.1|:14770674:14770763:+	-27.4	S-A-m0002-5p	-	8	8	-	CTTCTCCCTGATCGAGGACCTCCAGAACGACCTGCTGAGCCACTCAGGCGTGCTGGACCCCTCGCACTCACCCATGGAAACGGCCGAGGC	..((((..(((.(((((...(((((.(((.((((..........))))))).)))))..)))))...)))....((....))...)))).	ATCGAGGACCTCCAGAACGACC	-
S-A-m0003	gi|289623176|gb|CM000908.1|:11732239:11732317:-	-22.2	-	S-A-m0003-3p	7	-	7	GAAGGAAGCTGTTCTCATTCATGCTCTGAACAAAACATGCTTTGTTAATTGATTGGGGTAGATGTGAGATGCTAGAAGG	......(((...((((((...(((((..(.(((((((.....))))..))).)..)))))...)))))).)))......	-	AATTGATTGGGGTAGATGTGAGA
S-A-m0004	gi|289623176|gb|CM000908.1|:36914576:36914657:-	-44.14	-	S-A-m0004-3p	6	-	6	GACGTTGCGGCATGCGGGATCTTTAGTTGTGGCGTGTGCATTCTTAGTTGCAGCAACTAAAGATCCCTCAGGCTGCAATGAA	..(((((((((.((.(((((((((((((((.(((..............))).))))))))))))))).)).)))))))))..	-	CAGCAACTAAAGATCCCTCAGG
S-A-m0005	gi|289623178|gb|CM000906.1|:36527996:36528072:+	-34.6	S-A-m0005-5p	S-A-m0005-3p	475	98	377	GGCTATGTCCACAGGCACGGCCAGTTTGAGCATTTTCACTGAATTGCCAAACCAGTTGTGCCTGTAGACACAACCTT	((...((((.(((((((((((..(((((.(((.(((....))).))))))))..))))))))))).))))...))..	ACAGGCACGGCCAGTTTGAGC	CCAAACCAGTTGTGCCTGTAG
S-A-m0006	gi|289623178|gb|CM000906.1|:36395486:36395585:-	-19.6	-	S-A-m0006-3p	5	-	5	CTGATGAAGGTACAGACATGTCCATTAACGAGTCCAGAAATGCAACAGATGAATCCCACCGAAGAAGACTGATTGCACATCTGGCTGAGCACATTCTCTT	..((((..((.(((....))))).......((.(((((..((((((((.....((.....))......))).)))))..))))))).....)))).....	-	ACTGATTGCACATCTGGCTGAGC
S-A-m0007	gi|289623179|gb|CM000905.1|:44516817:44516907:+	-35.8	-	S-A-m0007-3p	6	-	6	AAGGGCTGGCAGACTCTGTCAGCGTCCCGCCGGGCTTCCCTCTGTGACCTGCTCAGACAATGGAGAGAGGGATGGGCTGGGTGCTTGCTCT	....((((((((...))))))))....((((.(((((((((((.(..((............))).)))))))..)))).))))........	-	TGGAGAGAGGGATGGGCTGGG
S-A-m0008	gi|289623181|gb|CM000903.1|:49281633:49281720:+	-20.2	-	S-A-m0008-3p	6	-	6	CATAATGCGTTAGCCAAAAAGTTCATTCGAATTCTTCTGTTACATCATATGAAAAAATCTGAACAAACTTTTTGGCCAACCCAATGCA	.....((.(((.(((((((((((..(((((.((.((((((......))).))).)).)).)))..))))))))))).))).)).....	-	TCTGAACAAACTTTTTGGCCA
S-A-m0009	gi|289623182|gb|CM000902.1|:20273543:20273626:-	-38.7	-	S-A-m0009-3p	6	-	6	AGTATTGGGGTGGCCAAAAATTTCATTCGGATTTTTCTGCACCATCTTAAAAATCTGAACAAACTTTTTGGCCACCCCAAATCA	....((((((((((((((((.((..(((((((((((..(......)..)))))))))))..)).))))))))))))))))....	-	TCTGAACAAACTTTTTGGCCA
S-A-m0010	gi|289623186|gb|CM000898.1|:36565066:36565145:+	-39	-	S-A-m0010-3p	10	-	10	ATTGGGTTGGCCAAAAAAGTTCGTTTGGGTTTTCATACCATCTTCTGAAAAAACCTGAGCAAACTTTTTGGCCAACCCAA	.((((((((((((((((.(((.(((..((((((((..........)))..)))))..))).)))))))))))))))))))	-	AAAAACCTGAGCAAACTTTTTG
S-A-m0011	gi|289623186|gb|CM000898.1|:54112920:54113007:-	-34.9	-	S-A-m0011-3p	6	-	6	AATACTGGGTTAGCCAAAAAGTTCATTTCAGATTTTCCATACCATCATACAGTAATATCTGAACAAACTTTTTGGCCAACCCAGTACA	..(((((((((.(((((((((((...(((((((.......................)))))))..))))))))))).)))))))))..	-	TCTGAACAAACTTTTTGGCCA
S-A-m0012	gi|289623187|gb|CM000897.1|:30636001:30636087:+	-28.5	-	S-A-m0012-3p	6	-	6	TTATTGTGTTGGCCAAAAAATTCGCTCAGTTTTCTCATAACATGTTATGGAAAATATCTGAACAAACTTTTTGGCCAACCCTAGTAG	.(((((.((((((((((((.((.(.(((((((((.(((((....))))))))))...)))).).)).))))))))))))..))))).	-	TCTGAACAAACTTTTTGGCCA
S-A-m0013	gi|289623187|gb|CM000897.1|:61867945:61868031:+	-42.4	S-A-m0013-5p	-	7	7	-	CTGAGCCTGCTGCCAAGCCCACGTTCAAAGGCTGTTTCTTCAAAGTTAATGGTGCCGCCTTTGAGCTGGGAGGGGAAGCGGGCAGTT	....(((((((.((...((((.((((((((((.((.((............)).)).))))))))))))))...)).)))))))....	TGCCAAGCCCACGTTCAAAGG	-
S-A-m0014	gi|289623188|gb|CM000896.1|:30025489:30025579:-	-35.3	S-A-m0014-5p	-	9	9	-	TTAGGCTGTTTGGGGAAGCGCAGGAAACAGTGTTGTCTAGTGAAAAATAAAAATACTAGGTACTGTTTCCTTTTGTTTCCCCCAGGTTTCA	..(((((....(((((((((.(((((((((((...(((((((...........))))))))))))))))))..)))))))))..)))))..	TGGGGAAGCGCAGGAAACAGT	-
S-A-m0015	gi|289623192|gb|CM000892.1|:51134111:51134186:+	-20.94	S-A-m0015-5p	-	8	8	-	TTGTCTCTCTTGAGTTAAAGGAAAAGGAAAGTTCATCCACAGTCCCTTTCTTTTCCCTTTCACTTCAAAGAGCCAT	.((.((((.((((((.(((((.(((((((((..............))))))))).))))).)).)))))))).)).	TGAGTTAAAGGAAAAGGAAAGT	-
S-A-m0016	gi|289623192|gb|CM000892.1|:51192500:51192581:-	-47.3	S-A-m0016-5p	-	7	7	-	TGCCGCGTCGCACAGCTCCAGGGGACGCCGTTCCTGTCCTGGACTATGTGAGTGGTGCTCCCTGGAGCTGAGCAGCGCACAG	....((((.((.(((((((((((..(((((((((.(((...)))...).))))))))..))))))))))).)).))))....	CACAGCTCCAGGGGACGCCGTT	-
S-A-m0017	gi|289623193|gb|CM000891.1|:19969293:19969374:+	-46.9	-	S-A-m0017-3p	5	-	5	TTTCTTCTCTCTCCAGCTCCGTGTGTACGTTCTTAAAGGGTGATGAACTGGAATGTACTTGTGGAGTTGGAGAGAGGAGAAT	.(((((((((((((((((((..(.(((((((((.....(((.....)))))))))))).)..))))))))))))))))))).	-	AATGTACTTGTGGAGTTGGAG
S-A-m0018	gi|289623193|gb|CM000891.1|:21439066:21439138:+	-34.54	S-A-m0018-5p	-	29	29	-	GATTGGTGCTCCCAGGGATGTAGCTCCTAGTGCTGACCCTCCCTCTGGGGGCCCATCCCTGCAGTGCCTTTCT	((..((..((..((((((((..((((((((..............)))))))).)))))))).))..))..)).	CCCAGGGATGTAGCTCCTAGTGC	-
S-A-m0019	gi|289623193|gb|CM000891.1|:53828822:53828909:+	-29.2	-	S-A-m0019-3p	6	-	6	TTTATTGGGTAGGCCAAAAATGTTGTTAGAGGTTTTATGTTACATCATATGGAAAAATCTGAACAAACTTTTTGGCCAACTCTATAGC	.((((.((((.(((((((((.(((.(((((..((((((((......))))))))...)))))...)))))))))))).)))).)))).	-	TCTGAACAAACTTTTTGGCCA
S-A-m0020	gi|289623193|gb|CM000891.1|:68899178:68899265:+	-31	S-A-m0020-5p	-	5	5	-	ATATATTGGATTGGTCAAAAAGTTTGTTTGGATTTTTCCATAATATGTTACAGAAAAACCTGAATGAACTTTTTGGCCAACAATACAT	...(((((...(((((((((((((..((..(.((((((..(((....)))..)))))).)..))..))))))))))))).)))))...	TTGGTCAAAAAGTTTGTTTGG	-
S-A-m0021	gi|289623195|gb|CM000889.1|:12702266:12702345:+	-58.3	-	S-A-m0021-3p	6	-	6	GATCCACAATGCTGTGCTAACTTCAGTTGTCCAGTGAATTAGTCATGCTGGACAACTGAAGCTAGCACAGCATTGTGGAT	.((((((((((((((((((.(((((((((((((((...........))))))))))))))).))))))))))))))))))	-	TGGACAACTGAAGCTAGCACAG
S-A-m0022	gi|289623195|gb|CM000889.1|:16164505:16164585:-	-41.9	-	S-A-m0022-3p	10	-	10	ATGGGGTTGGCCAAAAAGTTCATTTGGGTTTTCCTATAGCATCCTACGGAAAAACCTGAGCAAACTTTTTGGCCAAGCCCA	.((((.((((((((((((((..((..((((((.(..(((....)))..).))))))..))..)))))))))))))).))))	-	AAAAACCTGAGCAAACTTTTTG
S-A-m0023	gi|289623195|gb|CM000889.1|:17744790:17744864:-	-35.7	S-A-m0023-5p	-	6	6	-	TCCCTAGGGTTAGGGGGAGCGGTTGGAGGACTGGGGGCTCAGCCTTCCTGCCTCTCTCCGTAGGAGCCTGGTGAA	((.(((((.((..((((((.(((.(((((.((((....)))).))))).))).))))))....)).))))).)).	TAGGGGGAGCGGTTGGAGGACT	-
S-A-m0024	gi|289623195|gb|CM000889.1|:33142801:33142889:-	-30.5	-	S-A-m0024-3p	6	-	6	ATGTTTTGGATTGGCCAAAGAATTCGTTTGGGTTTCTCTGTAACATTGTAAGGAAATATCTGAACAAACTTTTTGGCCAATGCAATGCA	.(((.(((.((((((((((((.((.(((..(((...(((.((......)).)))...)))..))).)).)))))))))))).))).)))	-	TCTGAACAAACTTTTTGGCCA
S-A-m0025	gi|289623195|gb|CM000889.1|:44600325:44600425:-	-36.7	-	S-A-m0025-3p	8	-	8	CCTTCTTCCGCGGTGAGCTGGTAGACCCCCCACACATACACACCAGGGGCACAGGAGACACTGGCGGTGAGGGGGAGCCCCGGTAGACTGTGGCCAGCAGT	.((.((.(((((((..(((((..(..(((((.(((...(......)..((.(((......))))).))).)))))..).)))))..)))))))..)).)).	-	TGAGGGGGAGCCCCGGTAGACTGT
S-A-m0026	gi|289623197|gb|CM000887.1|:49107071:49107151:+	-45.2	S-A-m0026-5p	-	11	11	-	CGCGTGGCGTGTTTCCGGTCGCTGTGCTCTCGCCGGAGCAGTACGGCGAGGTTCGGCGATCCGGGAACTTTTCCCTCCGCT	.(((.((.(.((((((((((((((.((.(((((((........))))))))).)))))).))))))))....)))..))).	GTTTCCGGTCGCTGTGCTCTCG	-
S-A-m0027	gi|289623197|gb|CM000887.1|:54365251:54365340:-	-45.4	-	S-A-m0027-3p	6	-	6	ATGTATTGGGTTGGCCAAAAAGTTCATTTGGTTTTTTTCTATAACATCATATGGGAAAATCTGAACAAACTTTTTGGCCAACTCAATACA	.(((((((((((((((((((((((..((..(..((((((((((......)))))))))).)..))..)))))))))))))))))))))))	-	TCTGAACAAACTTTTTGGCCA
S-A-m0028	gi|289623197|gb|CM000887.1|:102460369:102460447:-	-33.1	S-A-m0028-5p	-	8	8	-	GTGGGTGGTGCAGGGAGAAGGTGAGCAGAGGAATAGACTGTGCTGTCCACTCCTCCCTTCTCCGCAGCCAGGACTGGCT	....((((.(.((((((..((((((((.((.......)).))))...)))).)))))).).)))).((((....)))).	CAGGGAGAAGGTGAGCAGAGGA	-
S-A-m0029	gi|289623200|gb|CM000886.1|:65692687:65692776:+	-37.5	-	S-A-m0029-3p	6	-	6	GGTGTTGGATTGGCCAAAAAGTTCCCCCAGGTTTTTCCATCAGATCTTATGGAAAAAAATCTGAACAAACTTTTTGGCCAAGCCAATANN	..((((((.((((((((((((((....(((((((((((((........)))))..))))))))....)))))))))))))).))))))..	-	TCTGAACAAACTTTTTGGCCA
S-A-m0030	gi|289623200|gb|CM000886.1|:27148301:27148392:-	-44.9	-	S-A-m0030-3p	6	-	6	AGTATTGGGTTGGCTAAAAAGTTTGTTCAAGTTTTTCCTATAATGTCCTTAGAGAAAAAAATCTGAACAAACTTTTTGGCCAACCTAATAGT	..(((((((((((((((((((((((((((..(((((((((.........))).))))))....)))))))))))))))))))))))))))..	-	TCTGAACAAACTTTTTGGCCA
S-A-m0031	gi|289623201|gb|CM000885.1|:49545329:49545416:+	-23.9	-	S-A-m0031-3p	6	-	6	GAGTATTGTGTTGGACAAAATTATTGTTCGAATATTCCTATAAGATGGTAAGGAAAATCTGAACAAACTTTTTGGCCAGCTAAATATT	.((((((..(((((.(((((...(((((((.((.(((((((......)).))))).)).)))))))...))))).)))))..))))))	-	TCTGAACAAACTTTTTGGCCA

## Sheet: Late lactation
Id	location	mfe	Id(5p)	Id(3p)	count	count(5p)	count(3p)	seq	struct	seq(5p)	seq(3p)
HA-m0017	gi|289623201|gb|CM000885.1|:120160818:120160890:+	-24.7	-	HA-m0017-3p	8	-	8	TTTGTCCGTTCGCCGCCGCCGTCCCAGGACTAGTCACCGAGTTACTGGGCAGGGGAACGTGTGTTTCGGGGGA	.((.((((..(((((((.((..(((((((((........)))).)))))..))))..)).)))...)))).))	-	ACTGGGCAGGGGAACGTGTG
HA-m0012	gi|289623194|gb|CM000890.1|:108047311:108047393:-	-24.72	HA-m0012-5p	HA-m0012-3p	780	715	62	AGTCATTTTGAGAGGTAAAAAATTGATTTGACTAGTTCTTTAACACATCTAGCAAATCATTTTTTACTCTCCAAAAAGAACTC	..((.(((((.((((((((((((.((((((.((((.............))))))))))))))))))).)))))))).))....	AGAGGTAAAAAATTGATTTGACT	CAAATCATTTTTTACTCTCCA
HA-m0018	gi|289623201|gb|CM000885.1|:17232511:17232590:-	-26.1	HA-m0018-5p	-	12	12	-	TGAGGAGGCGTGTGAGAGAAGAGGACGCCTGGGTCCTGGCCTCACCCACCAGTCTGCTGCTTCTCCTGCAGGTGATTGAA	.......((.(((..((((((.((((...(((((.........)))))...))))....))))))..))).)).......	TGTGAGAGAAGAGGACGCCTGG	-
HA-m0013	gi|289623195|gb|CM000889.1|:12425855:12425950:+	-26.9	HA-m0013-5p	-	8	7	-	AACCCTGGCCTCAAGTGATGGAGAAGATGACCTGGGAGTACTGTGACCGAACTGGGATGTATTCGTACTGTCTGATGGGGCCTACCCCTCGGGTTT	(((((.(((((((...(((((.(((.(((.((..(..((......))....)..)).))).)))...)))))...)))))))........))))).	TCAAGTGATGGAGAAGATGA	-
HA-m0010	gi|289623190|gb|CM000894.1|:12949296:12949376:+	-28.2	-	HA-m0010-3p	7	-	7	TACTGGGGTGACCAAAAGGCTTGTCTGGGTATTTGATGAGACAGTATGAAAAACCCAAATGAACGTTTTGGCCAACCTAGT	.((((((.((.((((((.(.(..(.(((((.(((.(((......))).))).))))).)..).).)))))).)).))))))	-	AAAACCCAAATGAACGTTTTGG
HA-m0016	gi|289623201|gb|CM000885.1|:1584645:1584727:+	-29.5	-	HA-m0016-3p	7	-	7	TACAGGGCTAGCCAAAAATTTCACTCAGGTTTTTCTGTAGCATCTTGTGGGAAAACCCAAATGAACGTTTTGGCCAACCTGAT	..((((....(((((((..((((....((((((((..(((....)))..))))))))....))))..)))))))...))))..	-	AAAACCCAAATGAACGTTTTGG
HA-m0015	gi|289623197|gb|CM000887.1|:72837921:72837999:-	-31.67	HA-m0015-5p	-	11	11	-	AAGGTATTCCCTGGGAGTCGCTGAGAGGATGGAAAGTCTCTCCCTCCCTCAGTGCTCCCACTAAAGCTATTTTTGCCAG	..((((.....((((((.(((((((.(((.(((.......))).)))))))))))))))).............))))..	CTGGGAGTCGCTGAGAGGATGGA	-
HA-m0009	gi|289623187|gb|CM000897.1|:29192136:29192218:-	-34.3	-	HA-m0009-3p	7	-	7	TATTGAGCTGGCCAAAAGGGTTCGTTGGGTTTTCCCATAAGATATTACGGAAAAACCCAAATGAACGTTTTGGCCAACCCAAT	.((((.(.(((((((((.(.(((((((((((((.((.(((....))).)).))))))).))))))).))))))))).).))))	-	AAAACCCAAATGAACGTTTTGG
HA-m0004	gi|289623178|gb|CM000906.1|:36527996:36528072:+	-34.6	HA-m0004-5p	HA-m0004-3p	279	55	224	GGCTATGTCCACAGGCACGGCCAGTTTGAGCATTTTCACTGAATTGCCAAACCAGTTGTGCCTGTAGACACAACCTT	((...((((.(((((((((((..(((((.(((.(((....))).))))))))..))))))))))).))))...))..	ACAGGCACGGCCAGTTTGAGC	CCAAACCAGTTGTGCCTGTAG
HA-m0008	gi|289623183|gb|CM000901.1|:52730647:52730729:-	-34.6	-	HA-m0008-3p	7	-	7	TATTGGGTTGGCCAGAAAGTTGGTCCAAGCTTTTCTGTACCATCTTATGGAAAAACCCAAATGAACGTTTTGGCCAGCCCAAT	.((((((((((((((((.(((.((....(.(((((((((......))))))))).)....)).))).))))))))))))))))	-	AAAACCCAAATGAACGTTTTGG
HA-m0007	gi|289623181|gb|CM000903.1|:63154516:63154593:+	-36.5	HA-m0007-5p	-	5	5	-	TGGGTTGGCCAAAACGTTCATTTGAGTTTTTCCATGAGATTTTACAGAAAACCCGAATGAACATTTTGGCCAACTCAA	((((((((((((((.(((((((((.((((((...((........)))))))).))))))))).)))))))))))))).	AAAACGTTCATTTGAGTTTTT	-
HA-m0001	gi|289623175|gb|CM000909.1|:27800496:27800575:+	-43.02	-	HA-m0001-3p	12	-	12	TTCAGTGGAGGCCTCTGCCCCTCCTGCCTTTGCCTGCTCCCCTCCCCTGGGCTGGCAGGACTGTAGAGGTTTCCATGGAG	.((.((((((((((((((...(((((((...((((.............)))).)))))))..)))))))))))))).)).	-	GCTGGCAGGACTGTAGAGGT
HA-m0003	gi|289623177|gb|CM000907.1|:43743085:43743162:+	-44.4	-	HA-m0003-3p	10	-	10	TTGGGTTGGCCCAAAAGTTCATTCGAGCTTTTCCGTAACACCCTACGGAAACCCGAACGAACTTTTGGGCTAACTCAG	.(((((((((((((((((((.((((.(..((((((((......)))))))).))))).))))))))))))))))))).	-	GAAACCCGAACGAACTTTTGG
HA-m0014	gi|289623197|gb|CM000887.1|:49107071:49107151:+	-45.2	HA-m0014-5p	-	5	5	-	CGCGTGGCGTGTTTCCGGTCGCTGTGCTCTCGCCGGAGCAGTACGGCGAGGTTCGGCGATCCGGGAACTTTTCCCTCCGCT	.(((.((.(.((((((((((((((.((.(((((((........))))))))).)))))).))))))))....)))..))).	GTTTCCGGTCGCTGTGCTCTCG	-
HA-m0011	gi|289623192|gb|CM000892.1|:51192498:51192581:-	-47.3	HA-m0011-5p	HA-m0011-3p	12	11	1	TGCCGCGTCGCACAGCTCCAGGGGACGCCGTTCCTGTCCTGGACTATGTGAGTGGTGCTCCCTGGAGCTGAGCAGCGCACAGCC	....((((.((.(((((((((((..(((((((((.(((...)))...).))))))))..))))))))))).)).))))......	CACAGCTCCAGGGGACGCCGTT	TGGTGCTCCCTGGAGCTGAGCA
HA-m0002	gi|289623177|gb|CM000907.1|:3740338:3740419:+	-47.6	HA-m0002-5p	HA-m0002-3p	10	4	6	AGGGGGTGCGCGGGGGTGGGGGGCGGTGATGGGACTGCCTTTTCCTCCAGCAGCCCCTTCCCGCTCGCCAGCTCCCTCCCCC	.(((((...(.((((.(((.((((((.((.(((.((((...........)))).))).)))))))).))).))))).)))))	TGGGGGGCGGTGATGGGACTGCC	CAGCCCCTTCCCGCTCGCCAGC
HA-m0006	gi|289623180|gb|CM000904.1|:2835061:2835142:-	-63	HA-m0006-5p	HA-m0006-3p	13	11	2	CTTGTGGGAGAGATCTGTCCTGAAACCAGCATAGACTAGCAGCTGCCATGCTGGTTTCAGGACAGATCTCTCCCACAAGCTG	((((((((((((((((((((((((((((((((.(.(........)).))))))))))))))))))))))))))))))))...	AGATCTGTCCTGAAACCAGCAT	CTGGTTTCAGGACAGATCTCTC
HA-m0005	gi|289623180|gb|CM000904.1|:2835064:2835145:+	-66.7	HA-m0005-5p	HA-m0005-3p	13	11	2	CTTGTGGGAGAGATCTGTCCTGAAACCAGCATGGCAGCTGCTAGTCTATGCTGGTTTCAGGACAGATCTCTCCCACAAGCTG	(((((((((((((((((((((((((((((((((((........).))))))))))))))))))))))))))))))))))...	AGATCTGTCCTGAAACCAGCAT	CTGGTTTCAGGACAGATCTCTC

## Sheet: Novel_miRNAs
Novel_miRNA_name	Novel_miRNA_sequence	HA	HA_count	S-A	S-A_count
novel_mir_7	CCAAACCAGTTGTGCCTGTAG	HA-m0004_3p:224	224	S-A-m0005_3p:377	377
novel_mir_16	CCCAGGGATGTAGCTCCTAGTGC	-	0	S-A-m0018_5p:29	29
novel_mir_24	CTGGGAGTCGCTGAGAGGATGGA	HA-m0015_5p:11	11	-	0
novel_mir_5	GAAACCCGAACGAACTTTTGG	HA-m0003_3p:10	10	-	0
novel_mir_25	CAGGGAGAAGGTGAGCAGAGGA	-	0	S-A-m0028_5p:8	8
novel_mir_27	TGTGAGAGAAGAGGACGCCTGG	HA-m0018_5p:12	12	-	0
novel_mir_32	CACAGCTCCAGGGGACGCCGTT	HA-m0011_5p:11	11	S-A-m0016_5p:7	7
novel_mir_35	GTTTCCGGTCGCTGTGCTCTCG	HA-m0014_5p:5	5	S-A-m0026_5p:11	11
novel_mir_3	ATCGAGGACCTCCAGAACGACC	-	0	S-A-m0002_5p:8	8
novel_mir_10	AAAACCCAAATGAACGTTTTGG	HA-m0008_3p:7,HA-m0009_3p:7,HA-m0010_3p:7,HA-m0016_3p:7	7	-	0
novel_mir_33	AGAGGTAAAAAATTGATTTGACT	HA-m0012_5p:715	715	-	0
novel_mir_28	GCTGGCAGGACTGTAGAGGT	HA-m0001_3p:12	12	-	0
novel_mir_30	AGATCTGTCCTGAAACCAGCAT	HA-m0005_5p:11,HA-m0006_5p:11	11	-	0
novel_mir_37	AAAAACCTGAGCAAACTTTTTG	-	0	S-A-m0001_3p:10,S-A-m0010_3p:10,S-A-m0022_3p:10	10
novel_mir_44	TGGGGAAGCGCAGGAAACAGT	-	0	S-A-m0014_5p:9	9
novel_mir_50	TGAGGGGGAGCCCCGGTAGACTGT	-	0	S-A-m0025_3p:8	8
novel_mir_45	TGAGTTAAAGGAAAAGGAAAGT	-	0	S-A-m0015_5p:8	8
novel_mir_36	ACTGGGCAGGGGAACGTGTG	HA-m0017_3p:8	8	-	0
novel_mir_34	TCAAGTGATGGAGAAGATGA	HA-m0013_5p:7	7	-	0
novel_mir_43	TGCCAAGCCCACGTTCAAAGG	-	0	S-A-m0013_5p:7	7
novel_mir_38	AATTGATTGGGGTAGATGTGAGA	-	0	S-A-m0003_3p:7	7
novel_mir_48	TGGACAACTGAAGCTAGCACAG	-	0	S-A-m0021_3p:6	6
novel_mir_39	CAGCAACTAAAGATCCCTCAGG	-	0	S-A-m0004_3p:6	6
novel_mir_49	TAGGGGGAGCGGTTGGAGGACT	-	0	S-A-m0023_5p:6	6
novel_mir_42	TCTGAACAAACTTTTTGGCCA	-	0	S-A-m0008_3p:6,S-A-m0009_3p:6,S-A-m0011_3p:6,S-A-m0012_3p:6,S-A-m0019_3p:6,S-A-m0024_3p:6,S-A-m0027_3p:6,S-A-m0029_3p:6,S-A-m0030_3p:6,S-A-m0031_3p:6	6
novel_mir_41	TGGAGAGAGGGATGGGCTGGG	-	0	S-A-m0007_3p:6	6
novel_mir_29	CAGCCCCTTCCCGCTCGCCAGC	HA-m0002_3p:6	6	-	0
novel_mir_46	AATGTACTTGTGGAGTTGGAG	-	0	S-A-m0017_3p:5	5
novel_mir_47	TTGGTCAAAAAGTTTGTTTGG	-	0	S-A-m0020_5p:5	5
novel_mir_40	ACTGATTGCACATCTGGCTGAGC	-	0	S-A-m0006_3p:5	5
novel_mir_31	AAAACGTTCATTTGAGTTTTT	HA-m0007_5p:5	5	-	0
