# Supplementary material for: Identification of Novel and Differentially Expressed MicroRNAs of Dairy Goat Mammary Gland Tissues Using Solexa Sequencing and Bioinformatics
Source: PLoS One. 2012 Nov 14;7(11):e49463. doi: 10.1371/journal.pone.0049463 (PMC3498112; doi:10.1371/journal.pone.0049463)
Supplement: Table S5 — GO annotations for the predicted target genes. (XLS) [file pone.0049463.s009.xls]

## Sheet: Sheet1
Ontology	Class	number_of_HA_S-A	genes_of_HA_S-A
biological_process	cellular process	5617	gi|152124562|gb|EV447282.1|EV447282;gi|152124563|gb|EV447283.1|EV447283;gi|152115974|gb|EV438701.1|EV438701;gi|152120287|gb|EV443014.1|EV443014;gi|152115975|gb|EV438702.1|EV438702;gi|152116786|gb|EV439519.1|EV439519;gi|152116785|gb|EV439518.1|EV439518;gi|152117088|gb|EV439821.1|EV439821;gi|152124045|gb|EV446765.1|EV446765;gi|152118045|gb|EV440772.1|EV440772;gi|31088649|gb|CD051966.1|CD051966;gi|1…
biological_process	metabolic process	4810	gi|152124562|gb|EV447282.1|EV447282;gi|152124563|gb|EV447283.1|EV447283;gi|152115974|gb|EV438701.1|EV438701;gi|152120287|gb|EV443014.1|EV443014;gi|152115975|gb|EV438702.1|EV438702;gi|152118980|gb|EV441707.1|EV441707;gi|134154394|gb|CI999993.1|CI999993;gi|152116845|gb|EV439578.1|EV439578;gi|152124510|gb|EV447230.1|EV447230;gi|152115881|gb|EV438608.1|EV438608;gi|152118006|gb|EV440733.1|EV440733;gi|…
biological_process	biological regulation	2556	gi|152116287|gb|EV439020.1|EV439020;gi|152118062|gb|EV440789.1|EV440789;gi|152122101|gb|EV444828.1|EV444828;gi|152114427|gb|EV437154.1|EV437154;gi|152120898|gb|EV443625.1|EV443625;gi|152117475|gb|EV440208.1|EV440208;gi|152124302|gb|EV447022.1|EV447022;gi|152118372|gb|EV441099.1|EV441099;gi|152114428|gb|EV437155.1|EV437155;gi|152115974|gb|EV438701.1|EV438701;gi|152120287|gb|EV443014.1|EV443014;gi|…
biological_process	multicellular organismal process	2269	gi|152114427|gb|EV437154.1|EV437154;gi|152120898|gb|EV443625.1|EV443625;gi|152117475|gb|EV440208.1|EV440208;gi|152124302|gb|EV447022.1|EV447022;gi|152118372|gb|EV441099.1|EV441099;gi|152114428|gb|EV437155.1|EV437155;gi|152114624|gb|EV437351.1|EV437351;gi|152118417|gb|EV441144.1|EV441144;gi|31088474|gb|CD051791.1|CD051791;gi|152116336|gb|EV439069.1|EV439069;gi|152120404|gb|EV443131.1|EV443131;gi|1…
biological_process	regulation of biological process	2122	gi|152114427|gb|EV437154.1|EV437154;gi|152120898|gb|EV443625.1|EV443625;gi|152117475|gb|EV440208.1|EV440208;gi|152124302|gb|EV447022.1|EV447022;gi|152118372|gb|EV441099.1|EV441099;gi|152114428|gb|EV437155.1|EV437155;gi|152115974|gb|EV438701.1|EV438701;gi|152120287|gb|EV443014.1|EV443014;gi|152115975|gb|EV438702.1|EV438702;gi|152116786|gb|EV439519.1|EV439519;gi|152116785|gb|EV439518.1|EV439518;gi|…
biological_process	developmental process	2102	gi|152114427|gb|EV437154.1|EV437154;gi|152120898|gb|EV443625.1|EV443625;gi|152117475|gb|EV440208.1|EV440208;gi|152124302|gb|EV447022.1|EV447022;gi|152118372|gb|EV441099.1|EV441099;gi|152114428|gb|EV437155.1|EV437155;gi|152115985|gb|EV438718.1|EV438718;gi|152115526|gb|EV438253.1|EV438253;gi|152121253|gb|EV443980.1|EV443980;gi|152123391|gb|EV446111.1|EV446111;gi|152119834|gb|EV442561.1|EV442561;gi|…
biological_process	localization	1923	gi|152115974|gb|EV438701.1|EV438701;gi|152115975|gb|EV438702.1|EV438702;gi|152124045|gb|EV446765.1|EV446765;gi|152118045|gb|EV440772.1|EV440772;gi|31088649|gb|CD051966.1|CD051966;gi|152114429|gb|EV437156.1|EV437156;gi|152122499|gb|EV445227.1|EV445227;gi|152124247|gb|EV446967.1|EV446967;gi|152114430|gb|EV437157.1|EV437157;gi|152119455|gb|EV442182.1|EV442182;gi|152124234|gb|EV446954.1|EV446954;gi|1…
biological_process	response to stimulus	1838	gi|152124562|gb|EV447282.1|EV447282;gi|152124563|gb|EV447283.1|EV447283;gi|152116287|gb|EV439020.1|EV439020;gi|152123417|gb|EV446137.1|EV446137;gi|152125043|gb|EV447762.1|EV447762;gi|152116997|gb|EV439730.1|EV439730;gi|152125042|gb|EV447761.1|EV447761;gi|152123317|gb|EV446037.1|EV446037;gi|320096446|gb|HS990005.1|HS990005;gi|152124981|gb|EV447700.1|EV447700;gi|152118062|gb|EV440789.1|EV440789;gi|…
biological_process	cellular component organization or biogenesis	1760	gi|152118748|gb|EV441475.1|EV441475;gi|152118749|gb|EV441476.1|EV441476;gi|152120829|gb|EV443556.1|EV443556;gi|152120530|gb|EV443257.1|EV443257;gi|152120828|gb|EV443555.1|EV443555;gi|152120529|gb|EV443256.1|EV443256;gi|152122002|gb|EV444729.1|EV444729;gi|152122003|gb|EV444730.1|EV444730;gi|152117335|gb|EV440068.1|EV440068;gi|152118019|gb|EV440746.1|EV440746;gi|152115535|gb|EV438262.1|EV438262;gi|…
biological_process	establishment of localization	1375	gi|152124045|gb|EV446765.1|EV446765;gi|152118045|gb|EV440772.1|EV440772;gi|31088649|gb|CD051966.1|CD051966;gi|152114429|gb|EV437156.1|EV437156;gi|152122499|gb|EV445227.1|EV445227;gi|152124247|gb|EV446967.1|EV446967;gi|152114430|gb|EV437157.1|EV437157;gi|152119455|gb|EV442182.1|EV442182;gi|152124234|gb|EV446954.1|EV446954;gi|152114325|gb|EV437052.1|EV437052;gi|152116475|gb|EV439208.1|EV439208;gi|1…
biological_process	signaling	1288	gi|152114427|gb|EV437154.1|EV437154;gi|152120898|gb|EV443625.1|EV443625;gi|152117475|gb|EV440208.1|EV440208;gi|152124302|gb|EV447022.1|EV447022;gi|152118372|gb|EV441099.1|EV441099;gi|152114428|gb|EV437155.1|EV437155;gi|152119931|gb|EV442658.1|EV442658;gi|152118942|gb|EV441669.1|EV441669;gi|152123498|gb|EV446218.1|EV446218;gi|152125665|gb|EV448384.1|EV448384;gi|152118676|gb|EV441403.1|EV441403;gi|…
biological_process	reproduction	858	gi|152117928|gb|EV440655.1|EV440655;gi|152125208|gb|EV447927.1|EV447927;gi|152117737|gb|EV440470.1|EV440470;gi|320096379|gb|HS989938.1|HS989938;gi|152113929|gb|EV436656.1|EV436656;gi|320096467|gb|HS990026.1|HS990026;gi|152121165|gb|EV443892.1|EV443892;gi|152114607|gb|EV437334.1|EV437334;gi|152116968|gb|EV439701.1|EV439701;gi|152113742|gb|EV436469.1|EV436469;gi|152115706|gb|EV438433.1|EV438433;gi|…
biological_process	signaling process	835	gi|152119931|gb|EV442658.1|EV442658;gi|152118942|gb|EV441669.1|EV441669;gi|152123498|gb|EV446218.1|EV446218;gi|152125665|gb|EV448384.1|EV448384;gi|31088452|gb|CD051769.1|CD051769;gi|152123096|gb|EV445824.1|EV445824;gi|31088550|gb|CD051867.1|CD051867;gi|152116005|gb|EV438738.1|EV438738;gi|152113617|gb|EV436344.1|EV436344;gi|152120847|gb|EV443574.1|EV443574;gi|152121080|gb|EV443807.1|EV443807;gi|15…
biological_process	reproductive process	822	gi|152117928|gb|EV440655.1|EV440655;gi|152125208|gb|EV447927.1|EV447927;gi|152117737|gb|EV440470.1|EV440470;gi|320096379|gb|HS989938.1|HS989938;gi|152113929|gb|EV436656.1|EV436656;gi|320096467|gb|HS990026.1|HS990026;gi|152121165|gb|EV443892.1|EV443892;gi|152114607|gb|EV437334.1|EV437334;gi|152116968|gb|EV439701.1|EV439701;gi|152113742|gb|EV436469.1|EV436469;gi|152115706|gb|EV438433.1|EV438433;gi|…
biological_process	death	766	gi|152119197|gb|EV441924.1|EV441924;gi|152123136|gb|EV445864.1|EV445864;gi|152113476|gb|EV436203.1|EV436203;gi|31088549|gb|CD051866.1|CD051866;gi|152114427|gb|EV437154.1|EV437154;gi|152120898|gb|EV443625.1|EV443625;gi|152114428|gb|EV437155.1|EV437155;gi|152115610|gb|EV438337.1|EV438337;gi|152125471|gb|EV448190.1|EV448190;gi|152117335|gb|EV440068.1|EV440068;gi|152118772|gb|EV441499.1|EV441499;gi|3…
biological_process	negative regulation of biological process	701	gi|152115974|gb|EV438701.1|EV438701;gi|152115975|gb|EV438702.1|EV438702;gi|152118609|gb|EV441336.1|EV441336;gi|152121436|gb|EV444163.1|EV444163;gi|152117980|gb|EV440707.1|EV440707;gi|152123574|gb|EV446294.1|EV446294;gi|152113353|gb|EV436080.1|EV436080;gi|152115817|gb|EV438544.1|EV438544;gi|152113748|gb|EV436475.1|EV436475;gi|152123925|gb|EV446645.1|EV446645;gi|152121428|gb|EV444155.1|EV444155;gi|…
biological_process	positive regulation of biological process	655	gi|152115985|gb|EV438718.1|EV438718;gi|152115526|gb|EV438253.1|EV438253;gi|152121253|gb|EV443980.1|EV443980;gi|152123391|gb|EV446111.1|EV446111;gi|152118676|gb|EV441403.1|EV441403;gi|152115303|gb|EV438030.1|EV438030;gi|152120076|gb|EV442803.1|EV442803;gi|152114382|gb|EV437109.1|EV437109;gi|152122556|gb|EV445284.1|EV445284;gi|31088713|gb|CD052030.1|CD052030;gi|152114380|gb|EV437107.1|EV437107;gi|1…
biological_process	viral reproduction	549	gi|152117928|gb|EV440655.1|EV440655;gi|152125208|gb|EV447927.1|EV447927;gi|152117737|gb|EV440470.1|EV440470;gi|320096379|gb|HS989938.1|HS989938;gi|152113929|gb|EV436656.1|EV436656;gi|320096467|gb|HS990026.1|HS990026;gi|152121165|gb|EV443892.1|EV443892;gi|152114607|gb|EV437334.1|EV437334;gi|152116968|gb|EV439701.1|EV439701;gi|152113742|gb|EV436469.1|EV436469;gi|152115706|gb|EV438433.1|EV438433;gi|…
biological_process	immune system process	511	gi|152116786|gb|EV439519.1|EV439519;gi|152116785|gb|EV439518.1|EV439518;gi|152117088|gb|EV439821.1|EV439821;gi|152115985|gb|EV438718.1|EV438718;gi|152115526|gb|EV438253.1|EV438253;gi|152121253|gb|EV443980.1|EV443980;gi|152123391|gb|EV446111.1|EV446111;gi|152118609|gb|EV441336.1|EV441336;gi|152121436|gb|EV444163.1|EV444163;gi|152117980|gb|EV440707.1|EV440707;gi|152123574|gb|EV446294.1|EV446294;gi|…
biological_process	locomotion	437	gi|152115974|gb|EV438701.1|EV438701;gi|152115975|gb|EV438702.1|EV438702;gi|152113605|gb|EV436332.1|EV436332;gi|152121094|gb|EV443821.1|EV443821;gi|152115610|gb|EV438337.1|EV438337;gi|152123019|gb|EV445747.1|EV445747;gi|152115118|gb|EV437845.1|EV437845;gi|152114427|gb|EV437154.1|EV437154;gi|152114525|gb|EV437252.1|EV437252;gi|152120898|gb|EV443625.1|EV443625;gi|152119522|gb|EV442249.1|EV442249;gi|…
biological_process	multi-organism process	351	gi|270017915|gb|GT736457.1|GT736457;gi|270017860|gb|GT736402.1|GT736402;gi|320096363|gb|HS989922.1|HS989922;gi|270017914|gb|GT736456.1|GT736456;gi|270017913|gb|GT736455.1|GT736455;gi|270017916|gb|GT736458.1|GT736458;gi|1292842|gb|Z71917.1|Z71917;gi|380862168|gb|JK033932.1|JK033932;gi|320096379|gb|HS989938.1|HS989938;gi|152114607|gb|EV437334.1|EV437334;gi|152119791|gb|EV442518.1|EV442518;gi|152115…
biological_process	biological adhesion	277	gi|152120604|gb|EV443331.1|EV443331;gi|152120605|gb|EV443332.1|EV443332;gi|270017915|gb|GT736457.1|GT736457;gi|270017860|gb|GT736402.1|GT736402;gi|320096363|gb|HS989922.1|HS989922;gi|270017914|gb|GT736456.1|GT736456;gi|270017913|gb|GT736455.1|GT736455;gi|270017916|gb|GT736458.1|GT736458;gi|152125735|gb|EV448454.1|EV448454;gi|152118609|gb|EV441336.1|EV441336;gi|152117980|gb|EV440707.1|EV440707;gi|…
biological_process	growth	167	gi|1292842|gb|Z71917.1|Z71917;gi|380862168|gb|JK033932.1|JK033932;gi|152120829|gb|EV443556.1|EV443556;gi|152120530|gb|EV443257.1|EV443257;gi|320096374|gb|HS989933.1|HS989933;gi|152120828|gb|EV443555.1|EV443555;gi|152120529|gb|EV443256.1|EV443256;gi|152121112|gb|EV443839.1|EV443839;gi|152122002|gb|EV444729.1|EV444729;gi|152122003|gb|EV444730.1|EV444730;gi|152117335|gb|EV440068.1|EV440068;gi|152118…
biological_process	cell proliferation	146	gi|152114624|gb|EV437351.1|EV437351;gi|152113757|gb|EV436484.1|EV436484;gi|31088577|gb|CD051894.1|CD051894;gi|152122605|gb|EV445333.1|EV445333;gi|152116155|gb|EV438888.1|EV438888;gi|152113756|gb|EV436483.1|EV436483;gi|152115513|gb|EV438240.1|EV438240;gi|152124649|gb|EV447369.1|EV447369;gi|152121112|gb|EV443839.1|EV443839;gi|152115471|gb|EV438198.1|EV438198;gi|152115772|gb|EV438499.1|EV438499;gi|1…
biological_process	rhythmic process	52	gi|152117979|gb|EV440706.1|EV440706;gi|152113120|gb|EV435847.1|EV435847;gi|152115610|gb|EV438337.1|EV438337;gi|152124586|gb|EV447306.1|EV447306;gi|152114427|gb|EV437154.1|EV437154;gi|152123913|gb|EV446633.1|EV446633;gi|152113542|gb|EV436269.1|EV436269;gi|152120898|gb|EV443625.1|EV443625;gi|152113166|gb|EV435893.1|EV435893;gi|320096368|gb|HS989927.1|HS989927;gi|31088479|gb|CD051796.1|CD051796;gi|1…
biological_process	cell killing	44	gi|152119197|gb|EV441924.1|EV441924;gi|152123136|gb|EV445864.1|EV445864;gi|152124103|gb|EV446823.1|EV446823;gi|152118781|gb|EV441508.1|EV441508;gi|145280684|gb|ES321909.1|ES321909;gi|152120145|gb|EV442872.1|EV442872;gi|152121111|gb|EV443838.1|EV443838;gi|152121930|gb|EV444657.1|EV444657;gi|152114568|gb|EV437295.1|EV437295;gi|152122450|gb|EV445178.1|EV445178;gi|152125484|gb|EV448203.1|EV448203;gi|…
biological_process	pigmentation	16	gi|152113555|gb|EV436282.1|EV436282;gi|152113215|gb|EV435942.1|EV435942;gi|152121309|gb|EV444036.1|EV444036;gi|152113980|gb|EV436707.1|EV436707;gi|152115200|gb|EV437927.1|EV437927;gi|145280693|gb|ES321918.1|ES321918;gi|152115077|gb|EV437804.1|EV437804;gi|152113979|gb|EV436706.1|EV436706;gi|152123723|gb|EV446443.1|EV446443;gi|152113170|gb|EV435897.1|EV435897;gi|152121547|gb|EV444274.1|EV444274;gi|…
cellular_component	cell	6606	gi|152117928|gb|EV440655.1|EV440655;gi|152119171|gb|EV441898.1|EV441898;gi|152125208|gb|EV447927.1|EV447927;gi|152121700|gb|EV444427.1|EV444427;gi|152117737|gb|EV440470.1|EV440470;gi|152120918|gb|EV443645.1|EV443645;gi|152116904|gb|EV439637.1|EV439637;gi|31088485|gb|CD051802.1|CD051802;gi|152113929|gb|EV436656.1|EV436656;gi|320096467|gb|HS990026.1|HS990026;gi|31088550|gb|CD051867.1|CD051867;gi|15…
cellular_component	cell part	6538	gi|152117928|gb|EV440655.1|EV440655;gi|152119171|gb|EV441898.1|EV441898;gi|152125208|gb|EV447927.1|EV447927;gi|152121700|gb|EV444427.1|EV444427;gi|152117737|gb|EV440470.1|EV440470;gi|152120918|gb|EV443645.1|EV443645;gi|152116904|gb|EV439637.1|EV439637;gi|31088485|gb|CD051802.1|CD051802;gi|152113929|gb|EV436656.1|EV436656;gi|320096467|gb|HS990026.1|HS990026;gi|31088550|gb|CD051867.1|CD051867;gi|15…
cellular_component	extracellular region	706	gi|152116287|gb|EV439020.1|EV439020;gi|152118062|gb|EV440789.1|EV440789;gi|152115974|gb|EV438701.1|EV438701;gi|152120287|gb|EV443014.1|EV443014;gi|152115975|gb|EV438702.1|EV438702;gi|152119889|gb|EV442616.1|EV442616;gi|152120770|gb|EV443497.1|EV443497;gi|152123975|gb|EV446695.1|EV446695;gi|152124764|gb|EV447484.1|EV447484;gi|31088462|gb|CD051779.1|CD051779;gi|152122905|gb|EV445633.1|EV445633;gi|1…
cellular_component	extracellular region part	422	gi|152116287|gb|EV439020.1|EV439020;gi|152118062|gb|EV440789.1|EV440789;gi|152115974|gb|EV438701.1|EV438701;gi|152120287|gb|EV443014.1|EV443014;gi|152115975|gb|EV438702.1|EV438702;gi|152119889|gb|EV442616.1|EV442616;gi|152120770|gb|EV443497.1|EV443497;gi|152123975|gb|EV446695.1|EV446695;gi|152124764|gb|EV447484.1|EV447484;gi|31088462|gb|CD051779.1|CD051779;gi|152122905|gb|EV445633.1|EV445633;gi|1…
cellular_component	macromolecular complex	1949	gi|152117928|gb|EV440655.1|EV440655;gi|152119171|gb|EV441898.1|EV441898;gi|152125208|gb|EV447927.1|EV447927;gi|152121700|gb|EV444427.1|EV444427;gi|152117737|gb|EV440470.1|EV440470;gi|152120918|gb|EV443645.1|EV443645;gi|152116904|gb|EV439637.1|EV439637;gi|31088485|gb|CD051802.1|CD051802;gi|152113929|gb|EV436656.1|EV436656;gi|320096467|gb|HS990026.1|HS990026;gi|31088550|gb|CD051867.1|CD051867;gi|15…
cellular_component	membrane-enclosed lumen	1182	gi|152121434|gb|EV444161.1|EV444161;gi|152122389|gb|EV445117.1|EV445117;gi|152119208|gb|EV441935.1|EV441935;gi|152120666|gb|EV443393.1|EV443393;gi|152125646|gb|EV448365.1|EV448365;gi|152123858|gb|EV446578.1|EV446578;gi|152115857|gb|EV438584.1|EV438584;gi|152114013|gb|EV436740.1|EV436740;gi|152116898|gb|EV439631.1|EV439631;gi|152123114|gb|EV445842.1|EV445842;gi|152123460|gb|EV446180.1|EV446180;gi|…
cellular_component	organelle	4832	gi|152120187|gb|EV442914.1|EV442914;gi|152123573|gb|EV446293.1|EV446293;gi|152114063|gb|EV436790.1|EV436790;gi|134154384|gb|CI999983.1|CI999983;gi|152125355|gb|EV448074.1|EV448074;gi|152116287|gb|EV439020.1|EV439020;gi|152113194|gb|EV435921.1|EV435921;gi|152113416|gb|EV436143.1|EV436143;gi|152123723|gb|EV446443.1|EV446443;gi|152124462|gb|EV447182.1|EV447182;gi|152119965|gb|EV442692.1|EV442692;gi|…
cellular_component	organelle part	3049	gi|152120187|gb|EV442914.1|EV442914;gi|152123573|gb|EV446293.1|EV446293;gi|152114063|gb|EV436790.1|EV436790;gi|134154384|gb|CI999983.1|CI999983;gi|152125355|gb|EV448074.1|EV448074;gi|152116287|gb|EV439020.1|EV439020;gi|152113194|gb|EV435921.1|EV435921;gi|152113416|gb|EV436143.1|EV436143;gi|152123723|gb|EV446443.1|EV446443;gi|152124462|gb|EV447182.1|EV447182;gi|152119965|gb|EV442692.1|EV442692;gi|…
cellular_component	synapse	2	gi|152123380|gb|EV446100.1|EV446100;gi|152114224|gb|EV436951.1|EV436951
cellular_component	virion	9	gi|152125219|gb|EV447938.1|EV447938;gi|152125218|gb|EV447937.1|EV447937;gi|152118919|gb|EV441646.1|EV441646;gi|152123814|gb|EV446534.1|EV446534;gi|152121644|gb|EV444371.1|EV444371;gi|152118918|gb|EV441645.1|EV441645;gi|152116886|gb|EV439619.1|EV439619;gi|152116887|gb|EV439620.1|EV439620;gi|152123813|gb|EV446533.1|EV446533
molecular_function	binding	4834	gi|152124310|gb|EV447030.1|EV447030;gi|152121492|gb|EV444219.1|EV444219;gi|152123251|gb|EV445971.1|EV445971;gi|320096375|gb|HS989934.1|HS989934;gi|152115974|gb|EV438701.1|EV438701;gi|270017915|gb|GT736457.1|GT736457;gi|152113255|gb|EV435982.1|EV435982;gi|270017860|gb|GT736402.1|GT736402;gi|152119522|gb|EV442249.1|EV442249;gi|320096368|gb|HS989927.1|HS989927;gi|152123545|gb|EV446265.1|EV446265;gi|…
molecular_function	catalytic activity	2726	gi|152122849|gb|EV445577.1|EV445577;gi|152122354|gb|EV445082.1|EV445082;gi|152115160|gb|EV437887.1|EV437887;gi|152116183|gb|EV438916.1|EV438916;gi|152116182|gb|EV438915.1|EV438915;gi|152118566|gb|EV441293.1|EV441293;gi|152124585|gb|EV447305.1|EV447305;gi|152124584|gb|EV447304.1|EV447304;gi|152123051|gb|EV445779.1|EV445779;gi|152122142|gb|EV444869.1|EV444869;gi|152123121|gb|EV445849.1|EV445849;gi|…
molecular_function	molecular transducer activity	361	gi|152114624|gb|EV437351.1|EV437351;gi|31088485|gb|CD051802.1|CD051802;gi|152120218|gb|EV442945.1|EV442945;gi|152119782|gb|EV442509.1|EV442509;gi|152120744|gb|EV443471.1|EV443471;gi|366036151|gb|JK475069.1|JK475069;gi|152125640|gb|EV448359.1|EV448359;gi|152118324|gb|EV441051.1|EV441051;gi|152114043|gb|EV436770.1|EV436770;gi|152115610|gb|EV438337.1|EV438337;gi|152120526|gb|EV443253.1|EV443253;gi|1…
molecular_function	enzyme regulator activity	344	gi|152115858|gb|EV438585.1|EV438585;gi|152114602|gb|EV437329.1|EV437329;gi|152115555|gb|EV438282.1|EV438282;gi|152114912|gb|EV437639.1|EV437639;gi|152120585|gb|EV443312.1|EV443312;gi|152119566|gb|EV442293.1|EV442293;gi|152121641|gb|EV444368.1|EV444368;gi|152116790|gb|EV439523.1|EV439523;gi|152114709|gb|EV437436.1|EV437436;gi|152116056|gb|EV438789.1|EV438789;gi|152116270|gb|EV439003.1|EV439003;gi|…
molecular_function	transporter activity	327	gi|152124255|gb|EV446975.1|EV446975;gi|152119121|gb|EV441848.1|EV441848;gi|152118304|gb|EV441031.1|EV441031;gi|152116128|gb|EV438861.1|EV438861;gi|152118303|gb|EV441030.1|EV441030;gi|152121393|gb|EV444120.1|EV444120;gi|152122253|gb|EV444981.1|EV444981;gi|152114377|gb|EV437104.1|EV437104;gi|152116662|gb|EV439395.1|EV439395;gi|152121392|gb|EV444119.1|EV444119;gi|152121224|gb|EV443951.1|EV443951;gi|…
molecular_function	protein binding transcription factor activity	164	gi|152116904|gb|EV439637.1|EV439637;gi|152124532|gb|EV447252.1|EV447252;gi|152120798|gb|EV443525.1|EV443525;gi|152119519|gb|EV442246.1|EV442246;gi|152117562|gb|EV440295.1|EV440295;gi|152125704|gb|EV448423.1|EV448423;gi|152121675|gb|EV444402.1|EV444402;gi|152123612|gb|EV446332.1|EV446332;gi|152113498|gb|EV436225.1|EV436225;gi|152116045|gb|EV438778.1|EV438778;gi|152122443|gb|EV445171.1|EV445171;gi|…
molecular_function	transcription regulator activity	68	gi|152123979|gb|EV446699.1|EV446699;gi|152118096|gb|EV440823.1|EV440823;gi|152121025|gb|EV443752.1|EV443752;gi|152123639|gb|EV446359.1|EV446359;gi|152122556|gb|EV445284.1|EV445284;gi|152120579|gb|EV443306.1|EV443306;gi|152113442|gb|EV436169.1|EV436169;gi|152114914|gb|EV437641.1|EV437641;gi|152123777|gb|EV446497.1|EV446497;gi|152125105|gb|EV447824.1|EV447824;gi|152114484|gb|EV437211.1|EV437211;gi|…
molecular_function	nucleic acid binding transcription factor activity	19	gi|152114850|gb|EV437577.1|EV437577;gi|152113503|gb|EV436230.1|EV436230;gi|152123612|gb|EV446332.1|EV446332;gi|152115404|gb|EV438131.1|EV438131;gi|152118676|gb|EV441403.1|EV441403;gi|152125055|gb|EV447774.1|EV447774;gi|152115211|gb|EV437938.1|EV437938;gi|152115212|gb|EV437939.1|EV437939;gi|152113657|gb|EV436384.1|EV436384;gi|152123420|gb|EV446140.1|EV446140;gi|152117580|gb|EV440313.1|EV440313;gi|…
molecular_function	antioxidant activity	15	gi|152121895|gb|EV444622.1|EV444622;gi|31088748|gb|CD052065.1|CD052065;gi|152124727|gb|EV447447.1|EV447447;gi|152122242|gb|EV444970.1|EV444970;gi|152121796|gb|EV444523.1|EV444523;gi|152116463|gb|EV439196.1|EV439196;gi|152119536|gb|EV442263.1|EV442263;gi|152121797|gb|EV444524.1|EV444524;gi|152125110|gb|EV447829.1|EV447829;gi|152125663|gb|EV448382.1|EV448382;gi|152121896|gb|EV444623.1|EV444623;gi|1…
molecular_function	structural molecule activity	8	gi|152117063|gb|EV439796.1|EV439796;gi|152113460|gb|EV436187.1|EV436187;gi|152122940|gb|EV445668.1|EV445668;gi|152115128|gb|EV437855.1|EV437855;gi|152125374|gb|EV448093.1|EV448093;gi|152115129|gb|EV437856.1|EV437856;gi|152115109|gb|EV437836.1|EV437836;gi|152115108|gb|EV437835.1|EV437835
molecular_function	translation regulator activity	8	gi|152114048|gb|EV436775.1|EV436775;gi|152116894|gb|EV439627.1|EV439627;gi|152116895|gb|EV439628.1|EV439628;gi|1292790|gb|Z71862.1|Z71862;gi|152118521|gb|EV441248.1|EV441248;gi|152121698|gb|EV444425.1|EV444425;gi|152114816|gb|EV437543.1|EV437543;gi|152121913|gb|EV444640.1|EV444640
molecular_function	receptor regulator activity	3	gi|313194|gb|X73543.1|X73543;gi|152121882|gb|EV444609.1|EV444609;gi|152121372|gb|EV444099.1|EV444099
molecular_function	channel regulator activity	2	gi|152114597|gb|EV437324.1|EV437324;gi|152114598|gb|EV437325.1|EV437325
